# Supplementary material
Source: PubMed Central journal article supplement (PMC6640512)
Supplement: MPP-11-347-s006.pdf [file MPP-11-347-s006.pdf]

|     |      |          |                         |    |    |
|-----|------|----------|-------------------------|----|----|
| 87  | Leaf | Positive | GGGAATTCGAGTTGCCGCAA    | 23 | 4  |
| 88  | Leaf | Positive | GGAAATTCGAGTTGCCGCAA    | 21 | 5  |
| 89  | Leaf | Positive | GGAAATTCGAGTTGCCGCAA    | 22 | 5  |
| 90  | Leaf | Positive | GGAAATTCGAGTTGCCGCAAAG  | 24 | 5  |
| 91  | Leaf | Positive | GGAAATTCGAGTTGCCGCAAAG  | 24 | 5  |
| 92  | Leaf | Positive | GGAAATTCGAGTTGCCGCAAAG  | 24 | 5  |
| 93  | Leaf | Positive | GGAAATTCGAGTTGCCGCAAAG  | 24 | 5  |
| 94  | Leaf | Positive | GGAAATTCGAGTTGCCGCAAAG  | 24 | 5  |
| 95  | Leaf | Positive | GGAAATTCGAGTTGCCGCAAAG  | 24 | 5  |
| 96  | Leaf | Positive | GGAAATTCGAGTTGCCGCAAAG  | 24 | 5  |
| 97  | Leaf | Positive | GGAAATTCGAGTTGCCGCAAAG  | 24 | 5  |
| 98  | Leaf | Positive | GGAAATTCGAGTTGCCGCAAAG  | 24 | 5  |
| 99  | Leaf | Positive | GGAAATTCGAGTTGCCGCAAAG  | 24 | 5  |
| 100 | Leaf | Positive | GGAAATTCGAGTTGCCGCAAAG  | 24 | 5  |
| 101 | Leaf | Positive | GGAAATTCGAGTTGCCGCAAAGG | 25 | 5  |
| 102 | Leaf | Positive | GAATTCGAGTTGCCGCAA      | 21 | 6  |
| 103 | Leaf | Positive | GAATTCGAGTTGCCGCAA      | 21 | 6  |
| 104 | Leaf | Positive | GAATTCGAGTTGCCGCAA      | 21 | 6  |
| 105 | Leaf | Positive | GAATTCGAGTTGCCGCAA      | 21 | 6  |
| 106 | Leaf | Positive | GAATTCGAGTTGCCGCAA      | 21 | 6  |
| 107 | Leaf | Positive | GAATTCGAGTTGCCGCAA      | 21 | 6  |
| 108 | Leaf | Positive | GAATTCGAGTTGCCGCAA      | 21 | 6  |
| 109 | Leaf | Positive | GAATTCGAGTTGCCGCAA      | 21 | 6  |
| 110 | Leaf | Positive | GAATTCGAGTTGCCGCAA      | 21 | 6  |
| 111 | Leaf | Positive | GAATTCGAGTTGCCGCAA      | 22 | 6  |
| 112 | Leaf | Positive | gaattctcgagttgccgcaaaa  | 22 | 6  |
| 113 | Leaf | Positive | gaattctcgagttgccgcaaaa  | 22 | 6  |
| 114 | Leaf | Positive | GAATTCGAGTTGCCGCAAAGG   | 24 | 6  |
| 115 | Leaf | Positive | GAATTCGAGTTGCCGCAAAGG   | 24 | 6  |
| 116 | Leaf | Positive | GAATTCGAGTTGCCGCAAAGG   | 24 | 6  |
| 117 | Leaf | Positive | GAATTCGAGTTGCCGCAAAGG   | 24 | 6  |
| 118 | Leaf | Positive | AATTCGAGTTGCCGCAA       | 21 | 7  |
| 119 | Leaf | Positive | aattctcgagttgccgcaaaa   | 21 | 7  |
| 120 | Leaf | Positive | AATTCGAGTTGCCGCAAAG     | 22 | 7  |
| 121 | Leaf | Positive | ATTCTCGAGTTGCCGCAAAG    | 21 | 8  |
| 122 | Leaf | Positive | ATTCTCGAGTTGCCGCAAAG    | 21 | 8  |
| 123 | Leaf | Positive | ATTCTCGAGTTGCCGCAAAG    | 21 | 8  |
| 124 | Leaf | Positive | ATTCTCGAGTTGCCGCAAAG    | 21 | 8  |
| 125 | Leaf | Positive | ATTCTCGAGTTGCCGCAAAG    | 21 | 8  |
| 126 | Leaf | Positive | ATTCTCGAGTTGCCGCAAAGGC  | 23 | 8  |
| 127 | Leaf | Positive | TCTCGAGTTGCCGCAAAGG     | 21 | 9  |
| 128 | Leaf | Positive | TCTCGAGTTGCCGCAAAGG     | 21 | 9  |
| 129 | Leaf | Positive | TCTCGAGTTGCCGCAAAGG     | 21 | 9  |
| 130 | Leaf | Positive | TCTCGAGTTGCCGCAAAGG     | 21 | 9  |
| 131 | Leaf | Positive | TCTCGAGTTGCCGCAAAGG     | 21 | 9  |
| 132 | Leaf | Positive | TCTCGAGTTGCCGCAAAGG     | 21 | 9  |
| 133 | Leaf | Positive | TCTCGAGTTGCCGCAAAGG     | 21 | 9  |
| 134 | Leaf | Positive | TCTCGAGTTGCCGCAAAGG     | 21 | 9  |
| 135 | Leaf | Positive | TCTCGAGTTGCCGCAAAGG     | 21 | 9  |
| 136 | Leaf | Positive | TCTCGAGTTGCCGCAAAGG     | 21 | 9  |
| 137 | Leaf | Positive | TCTCGAGTTGCCGCAAAGG     | 21 | 9  |
| 138 | Leaf | Positive | TCTCGAGTTGCCGCAAAGG     | 21 | 9  |
| 139 | Leaf | Positive | TCTCGAGTTGCCGCAAAGG     | 21 | 9  |
| 140 | Leaf | Positive | TCTCGAGTTGCCGCAAAGGC    | 22 | 9  |
| 141 | Leaf | Positive | TCTCGAGTTGCCGCAAAGGC    | 22 | 9  |
| 142 | Leaf | Positive | TCTCGAGTTGCCGCAAAGGC    | 22 | 9  |
| 143 | Leaf | Positive | TCTCGAGTTGCCGCAAAGGC    | 22 | 9  |
| 144 | Leaf | Positive | tctcgagttgccgcaaaa      | 18 | 10 |
| 145 | Leaf | Positive | TCTCGAGTTGCCGCAAAG      | 19 | 10 |
| 146 | Leaf | Positive | TCTCGAGTTGCCGCAAAGG     | 20 | 10 |
| 147 | Leaf | Positive | TCTCGAGTTGCCGCAAAGGC    | 21 | 10 |
| 148 | Leaf | Positive | TCTCGAGTTGCCGCAAAGGC    | 21 | 10 |
| 149 | Leaf | Positive | TCTCGAGTTGCCGCAAAGGC    | 21 | 10 |
| 150 | Leaf | Positive | TCTCGAGTTGCCGCAAAGGC    | 21 | 10 |
| 151 | Leaf | Positive | TCTCGAGTTGCCGCAAAGGC    | 21 | 10 |
| 152 | Leaf | Positive | CTCGAGTTGCCGCAAAGG      | 19 | 11 |
| 153 | Leaf | Positive | CTCGAGTTGCCGCAAAGG      | 19 | 11 |
| 154 | Leaf | Positive | ctcgagttgccgcaaaaagg    | 19 | 11 |
| 155 | Leaf | Positive | CTCGAGTTGCCGCAAAGGCA    | 21 | 11 |
| 156 | Leaf | Positive | CTCGAGTTGCCGCAAAGGCATG  | 23 | 11 |
| 157 | Leaf | Positive | TCGAGTTGCCGCAAAGGCATG   | 22 | 12 |
| 158 | Leaf | Positive | CGAGTTGCCGCAAAGG        | 17 | 13 |
| 159 | Leaf | Positive | CGAGTTGCCGCAAAGG        | 17 | 13 |
| 160 | Leaf | Positive | CGAGTTGCCGCAAAGGCATGC   | 22 | 13 |
| 161 | Leaf | Positive | CGAGTTGCCGCAAAGGCATGC   | 22 | 13 |
| 162 | Leaf | Positive | CGAGTTGCCGCAAAGGCATGC   | 22 | 13 |
| 163 | Leaf | Positive | CGAGTTGCCGCAAAGGCATGC   | 22 | 13 |
| 164 | Leaf | Positive | CCGCAAAGGCATGCAAAGA     | 20 | 20 |
| 165 | Leaf | Positive | CCGCAAAGGCATGCAAAGAA    | 21 | 20 |
| 166 | Leaf | Positive | CCGCAAAGGCATGCAAAGAA    | 21 | 20 |
| 167 | Leaf | Positive | CCGCAAAGGCATGCAAAGAA    | 21 | 20 |
| 168 | Leaf | Positive | CCGCAAAGGCATGCAAAGAAA   | 22 | 20 |
| 169 | Leaf | Positive | CGCAAAGGCATGCAAAGAAA    | 21 | 21 |
| 170 | Leaf | Positive | CGCAAAGGCATGCAAAGAAA    | 21 | 21 |
| 171 | Leaf | Positive | CGCAAAGGCATGCAAAGAAA    | 21 | 21 |
| 172 | Leaf | Positive | CGCAAAGGCATGCAAAGAAA    | 21 | 21 |
| 173 | Leaf | Positive | CGCAAAGGCATGCAAAGAAA    | 21 | 21 |
| 174 | Leaf | Positive | cgcaaaaggcatgcaagaaa    | 21 | 21 |

|     |      |          |                          |    |    |
|-----|------|----------|--------------------------|----|----|
| 175 | Leaf | Positive | CGCAAAAGGCATGCAAAGAAAA   | 22 | 21 |
| 176 | Leaf | Positive | CGCAAAAGGCATGCAAAGAAAA   | 23 | 21 |
| 177 | Leaf | Positive | CAAAAGGCATGCAAAGAAAA     | 21 | 23 |
| 178 | Leaf | Positive | CAAAAGGCATGCAAAGAAAA     | 21 | 23 |
| 179 | Leaf | Positive | CAAAAGGCATGCAAAGAAAA     | 21 | 23 |
| 180 | Leaf | Positive | CAAAAGGCATGCAAAGAAAA     | 21 | 23 |
| 181 | Leaf | Positive | CAAAAGGCATGCAAAGAAAA     | 21 | 23 |
| 182 | Leaf | Positive | CAAAAGGCATGCAAAGAAAA     | 21 | 23 |
| 183 | Leaf | Positive | CAAAAGGCATGCAAAGAAAA     | 21 | 23 |
| 184 | Leaf | Positive | aaaagcatgcaagaaaaa       | 21 | 24 |
| 185 | Leaf | Positive | GGCATGCAAAGAAAAACTA      | 20 | 28 |
| 186 | Leaf | Positive | CAAAGAAAAACTAGGCAGG      | 20 | 34 |
| 187 | Leaf | Positive | CAAAGAAAAACTAGGCAGG      | 20 | 34 |
| 188 | Leaf | Positive | CAAAGAAAAACTAGGCAGG      | 20 | 34 |
| 189 | Leaf | Positive | CAAAGAAAAACTAGGCAGGG     | 21 | 34 |
| 190 | Leaf | Positive | caagaaaaactaggcagg       | 21 | 34 |
| 191 | Leaf | Positive | AAAAAACTAGGCAGGGAGGTGCTT | 24 | 39 |
| 192 | Leaf | Positive | AAAAACTAGGCAGGGAGGTGCTT  | 23 | 40 |
| 193 | Leaf | Positive | AAAAACTAGGCAGGGAGGTGCTT  | 23 | 40 |
| 194 | Leaf | Positive | AAAAACTAGGCAGGGAGGTGCTTA | 24 | 40 |
| 195 | Leaf | Positive | AAAACTAGGCAGGGAGGTGCTT   | 22 | 41 |
| 196 | Leaf | Positive | AAAACTAGGCAGGGAGGTGCTTA  | 23 | 41 |
| 197 | Leaf | Positive | AAAACTAGGCAGGGAGGTGCTTAC | 24 | 41 |
| 198 | Leaf | Positive | AAAACTAGGCAGGGAGGTGCTTAC | 24 | 41 |
| 199 | Leaf | Positive | AAACTAGGCAGGGAGGTGCT     | 20 | 42 |
| 200 | Leaf | Positive | AAACTAGGCAGGGAGGTGCTT    | 21 | 42 |
| 201 | Leaf | Positive | AAACTAGGCAGGGAGGTGCTTACC | 24 | 42 |
| 202 | Leaf | Positive | AAACTAGGCAGGGAGGTGCTTACC | 24 | 42 |
| 203 | Leaf | Positive | AAACTAGGCAGGGAGGTGCTTACC | 24 | 42 |
| 204 | Leaf | Positive | AAACTAGGCAGGGAGGTGCTTACC | 24 | 42 |
| 205 | Leaf | Positive | aaactaggcaggaggtgcttacc  | 24 | 42 |
| 206 | Leaf | Positive | AACTAGGCAGGGAGGTGCT      | 19 | 43 |
| 207 | Leaf | Positive | AACTAGGCAGGGAGGTGCTTA    | 21 | 43 |
| 208 | Leaf | Positive | AACTAGGCAGGGAGGTGCTTA    | 21 | 43 |
| 209 | Leaf | Positive | AACTAGGCAGGGAGGTGCTTA    | 21 | 43 |
| 210 | Leaf | Positive | AACTAGGCAGGGAGGTGCTTA    | 21 | 43 |
| 211 | Leaf | Positive | AACTAGGCAGGGAGGTGCTTA    | 21 | 43 |
| 212 | Leaf | Positive | AACTAGGCAGGGAGGTGCTTACC  | 23 | 43 |
| 213 | Leaf | Positive | AACTAGGCAGGGAGGTGCTTACC  | 24 | 43 |
| 214 | Leaf | Positive | ACTAGGCAGGGAGGTGCTTAC    | 21 | 44 |
| 215 | Leaf | Positive | ACTAGGCAGGGAGGTGCTTAC    | 21 | 44 |
| 216 | Leaf | Positive | ACTAGGCAGGGAGGTGCTTACC   | 22 | 44 |
| 217 | Leaf | Positive | ACTAGGCAGGGAGGTGCTTACC   | 24 | 44 |
| 218 | Leaf | Positive | ctaggcaggaggtgct         | 17 | 45 |
| 219 | Leaf | Positive | CTAGGCAGGGAGGTGCTT       | 18 | 45 |
| 220 | Leaf | Positive | CTAGGCAGGGAGGTGCTTACC    | 20 | 45 |
| 221 | Leaf | Positive | CTAGGCAGGGAGGTGCTTACC    | 21 | 45 |
| 222 | Leaf | Positive | CTAGGCAGGGAGGTGCTTACC    | 21 | 45 |
| 223 | Leaf | Positive | CTAGGCAGGGAGGTGCTTACC    | 21 | 45 |
| 224 | Leaf | Positive | CTAGGCAGGGAGGTGCTTACC    | 21 | 45 |
| 225 | Leaf | Positive | CTAGGCAGGGAGGTGCTTACC    | 21 | 45 |
| 226 | Leaf | Positive | CTAGGCAGGGAGGTGCTTACC    | 21 | 45 |
| 227 | Leaf | Positive | CTAGGCAGGGAGGTGCTTACC    | 21 | 45 |
| 228 | Leaf | Positive | CTAGGCAGGGAGGTGCTTACC    | 21 | 45 |
| 229 | Leaf | Positive | CTAGGCAGGGAGGTGCTTACC    | 21 | 45 |
| 230 | Leaf | Positive | CTAGGCAGGGAGGTGCTTACC    | 21 | 45 |
| 231 | Leaf | Positive | CTAGGCAGGGAGGTGCTTACC    | 21 | 45 |
| 232 | Leaf | Positive | CTAGGCAGGGAGGTGCTTACC    | 21 | 45 |
| 233 | Leaf | Positive | CTAGGCAGGGAGGTGCTTACC    | 21 | 45 |
| 234 | Leaf | Positive | CTAGGCAGGGAGGTGCTTACC    | 21 | 45 |
| 235 | Leaf | Positive | CTAGGCAGGGAGGTGCTTACC    | 21 | 45 |
| 236 | Leaf | Positive | CTAGGCAGGGAGGTGCTTACC    | 21 | 45 |
| 237 | Leaf | Positive | CTAGGCAGGGAGGTGCTTACC    | 21 | 45 |
| 238 | Leaf | Positive | CTAGGCAGGGAGGTGCTTACC    | 21 | 45 |
| 239 | Leaf | Positive | CTAGGCAGGGAGGTGCTTACC    | 21 | 45 |
| 240 | Leaf | Positive | CTAGGCAGGGAGGTGCTTACC    | 21 | 45 |
| 241 | Leaf | Positive | CTAGGCAGGGAGGTGCTTACC    | 21 | 45 |
| 242 | Leaf | Positive | CTAGGCAGGGAGGTGCTTACC    | 21 | 45 |
| 243 | Leaf | Positive | CTAGGCAGGGAGGTGCTTACC    | 21 | 45 |
| 244 | Leaf | Positive | CTAGGCAGGGAGGTGCTTACC    | 21 | 45 |
| 245 | Leaf | Positive | CTAGGCAGGGAGGTGCTTACC    | 21 | 45 |
| 246 | Leaf | Positive | CTAGGCAGGGAGGTGCTTACC    | 21 | 45 |
| 247 | Leaf | Positive | CTAGGCAGGGAGGTGCTTACC    | 21 | 45 |
| 248 | Leaf | Positive | CTAGGCAGGGAGGTGCTTACC    | 21 | 45 |
| 249 | Leaf | Positive | CTAGGCAGGGAGGTGCTTACC    | 21 | 45 |
| 250 | Leaf | Positive | CTAGGCAGGGAGGTGCTTACC    | 21 | 45 |
| 251 | Leaf | Positive | CTAGGCAGGGAGGTGCTTACC    | 21 | 45 |
| 252 | Leaf | Positive | CTAGGCAGGGAGGTGCTTACC    | 21 | 45 |
| 253 | Leaf | Positive | CTAGGCAGGGAGGTGCTTACC    | 21 | 45 |
| 254 | Leaf | Positive | CTAGGCAGGGAGGTGCTTACC    | 21 | 45 |
| 255 | Leaf | Positive | CTAGGCAGGGAGGTGCTTACC    | 21 | 45 |
| 256 | Leaf | Positive | CTAGGCAGGGAGGTGCTTACC    | 21 | 45 |
| 257 | Leaf | Positive | CTAGGCAGGGAGGTGCTTACC    | 21 | 45 |
| 258 | Leaf | Positive | CTAGGCAGGGAGGTGCTTACC    | 21 | 45 |
| 259 | Leaf | Positive | CTAGGCAGGGAGGTGCTTACC    | 21 | 45 |
| 260 | Leaf | Positive | CTAGGCAGGGAGGTGCTTACC    | 21 | 45 |
| 261 | Leaf | Positive | CTAGGCAGGGAGGTGCTTACC    | 21 | 45 |
| 262 | Leaf | Positive | CTAGGCAGGGAGGTGCTTACC    | 21 | 45 |



















|      |      |          |                           |    |     |
|------|------|----------|---------------------------|----|-----|
| 1055 | Leaf | Positive | CTCTTCTCAGAATCCAGCGAGA    | 22 | 88  |
| 1056 | Leaf | Positive | CTCTTCTCAGAATCCAGCGAGA    | 22 | 88  |
| 1057 | Leaf | Positive | CTCTTCTCAGAATCCAGCGAGA    | 22 | 88  |
| 1058 | Leaf | Positive | CTCTTCTCAGAATCCAGCGAGA    | 22 | 88  |
| 1059 | Leaf | Positive | CTCTTCTCAGAATCCAGCGAGA    | 22 | 88  |
| 1060 | Leaf | Positive | CTCTTCTCAGAATCCAGCGAGAGG  | 24 | 88  |
| 1061 | Leaf | Positive | CTCTTCTCAGAATCCAGCGAGAGG  | 24 | 88  |
| 1062 | Leaf | Positive | CTCTTCTCAGAATCCAGCGAGAGG  | 24 | 88  |
| 1063 | Leaf | Positive | TCTTCTCAGAATCCAGCGAGA     | 21 | 89  |
| 1064 | Leaf | Positive | TCTTCTCAGAATCCAGCGAGA     | 21 | 89  |
| 1065 | Leaf | Positive | TCTTCTCAGAATCCAGCGAGA     | 21 | 89  |
| 1066 | Leaf | Positive | TCTTCTCAGAATCCAGCGAGA     | 21 | 89  |
| 1067 | Leaf | Positive | TCTTCTCAGAATCCAGCGAGA     | 21 | 89  |
| 1068 | Leaf | Positive | cttctcagaatccagcg         | 17 | 90  |
| 1069 | Leaf | Positive | CTTCTCAGAATCCAGCGAG       | 19 | 90  |
| 1070 | Leaf | Positive | CTTCTCAGAATCCAGCGAG       | 19 | 90  |
| 1071 | Leaf | Positive | CTTCTCAGAATCCAGCGAG       | 19 | 90  |
| 1072 | Leaf | Positive | cttctcagaatccagcgag       | 19 | 90  |
| 1073 | Leaf | Positive | CTTCTCAGAATCCAGCGAGAG     | 21 | 90  |
| 1074 | Leaf | Positive | CTTCTCAGAATCCAGCGAGAG     | 21 | 90  |
| 1075 | Leaf | Positive | CTTCTCAGAATCCAGCGAGAG     | 21 | 90  |
| 1076 | Leaf | Positive | CTTCTCAGAATCCAGCGAGAG     | 21 | 90  |
| 1077 | Leaf | Positive | CTTCTCAGAATCCAGCGAGAG     | 21 | 90  |
| 1078 | Leaf | Positive | CTTCTCAGAATCCAGCGAGAG     | 21 | 90  |
| 1079 | Leaf | Positive | CTTCTCAGAATCCAGCGAGAG     | 21 | 90  |
| 1080 | Leaf | Positive | CTTCTCAGAATCCAGCGAGAG     | 21 | 90  |
| 1081 | Leaf | Positive | CTTCTCAGAATCCAGCGAGAG     | 21 | 90  |
| 1082 | Leaf | Positive | CTTCTCAGAATCCAGCGAGAGG    | 22 | 90  |
| 1083 | Leaf | Positive | CTTCTCAGAATCCAGCGAGAGG    | 22 | 90  |
| 1084 | Leaf | Positive | cttctcagaatccagcgagag     | 22 | 90  |
| 1085 | Leaf | Positive | CTTCTCAGAATCCAGCGAGAGGC   | 23 | 90  |
| 1086 | Leaf | Positive | CTTCTCAGAATCCAGCGAGAGGC   | 24 | 90  |
| 1087 | Leaf | Positive | CTTCTCAGAATCCAGCGAGAGGC   | 24 | 90  |
| 1088 | Leaf | Positive | CTTCTCAGAATCCAGCGAGAGGC   | 24 | 90  |
| 1089 | Leaf | Positive | ttctcagaatccagcgag        | 18 | 91  |
| 1090 | Leaf | Positive | TTCTCAGAATCCAGCGAGAGG     | 21 | 91  |
| 1091 | Leaf | Positive | TTCTCAGAATCCAGCGAGAGG     | 21 | 91  |
| 1092 | Leaf | Positive | TTCTCAGAATCCAGCGAGAGG     | 21 | 91  |
| 1093 | Leaf | Positive | TTCTCAGAATCCAGCGAGAGG     | 21 | 91  |
| 1094 | Leaf | Positive | TTCTCAGAATCCAGCGAGAGGC    | 22 | 91  |
| 1095 | Leaf | Positive | TTCTCAGAATCCAGCGAGAGGC    | 22 | 91  |
| 1096 | Leaf | Positive | TTCTCAGAATCCAGCGAGAGGC    | 22 | 91  |
| 1097 | Leaf | Positive | TTCTCAGAATCCAGCGAGAGGCCT  | 24 | 91  |
| 1098 | Leaf | Positive | TCTCAGAATCCAGCGAGAGGC     | 21 | 92  |
| 1099 | Leaf | Positive | CTCAGAATCCAGCGAGAGGC      | 21 | 93  |
| 1100 | Leaf | Positive | TCAGAATCCAGCGAGAGGCCT     | 21 | 94  |
| 1101 | Leaf | Positive | TCAGAATCCAGCGAGAGGCCT     | 21 | 94  |
| 1102 | Leaf | Positive | TCAGAATCCAGCGAGAGGCCTG    | 22 | 94  |
| 1103 | Leaf | Positive | TCAGAATCCAGCGAGAGGCCTG    | 22 | 94  |
| 1104 | Leaf | Positive | TCAGAATCCAGCGAGAGGCCTG    | 22 | 94  |
| 1105 | Leaf | Positive | TCAGAATCCAGCGAGAGGCCTG    | 22 | 94  |
| 1106 | Leaf | Positive | TCAGAATCCAGCGAGAGGCCTGGA  | 24 | 94  |
| 1107 | Leaf | Positive | CAGAATCCAGCGAGAGGCCT      | 20 | 95  |
| 1108 | Leaf | Positive | CAGAATCCAGCGAGAGGCCTG     | 21 | 95  |
| 1109 | Leaf | Positive | CAGAATCCAGCGAGAGGCCTG     | 21 | 95  |
| 1110 | Leaf | Positive | CAGAATCCAGCGAGAGGCCTGG    | 22 | 95  |
| 1111 | Leaf | Positive | CAGAATCCAGCGAGAGGCCTGG    | 22 | 95  |
| 1112 | Leaf | Positive | CAGAATCCAGCGAGAGGCCTGGAG  | 24 | 95  |
| 1113 | Leaf | Positive | AGAAATCCAGCGAGAGGCCTGG    | 21 | 96  |
| 1114 | Leaf | Positive | AGAAATCCAGCGAGAGGCCTGG    | 21 | 96  |
| 1115 | Leaf | Positive | AGAAATCCAGCGAGAGGCCTGG    | 21 | 96  |
| 1116 | Leaf | Positive | AGAAATCCAGCGAGAGGCCTGG    | 21 | 96  |
| 1117 | Leaf | Positive | AGAAATCCAGCGAGAGGCCTGG    | 21 | 96  |
| 1118 | Leaf | Positive | AGAAATCCAGCGAGAGGCCTGG    | 21 | 96  |
| 1119 | Leaf | Positive | AGAAATCCAGCGAGAGGCCTGG    | 21 | 96  |
| 1120 | Leaf | Positive | AGAAATCCAGCGAGAGGCCTGG    | 21 | 96  |
| 1121 | Leaf | Positive | AGAAATCCAGCGAGAGGCCTGG    | 21 | 96  |
| 1122 | Leaf | Positive | AGAAATCCAGCGAGAGGCCTGGAGA | 24 | 96  |
| 1123 | Leaf | Positive | ATCCAGCGAGAGGCCTGGAGA     | 21 | 99  |
| 1124 | Leaf | Positive | TCCAGCGAGAGGCCTGGAGAGAGG  | 26 | 100 |
| 1125 | Leaf | Positive | CCAGCGAGAGGCCTGGAGAGAG    | 22 | 101 |
| 1126 | Leaf | Positive | CAGCGAGAGGCCTGGAGAGAG     | 21 | 102 |
| 1127 | Leaf | Positive | CAGCGAGAGGCCTGGAGAGAGG    | 24 | 102 |
| 1128 | Leaf | Positive | AGCGAGAGGCCTGGAGAGAGG     | 24 | 103 |
| 1129 | Leaf | Positive | AGAGCGTGGAGAGAGGCGCGGG    | 24 | 107 |
| 1130 | Leaf | Positive | GAGGCGTGGAGAGAGGCGCGG     | 21 | 108 |
| 1131 | Leaf | Positive | AGGCGTGGAGAGAGGCGCGGG     | 24 | 109 |
| 1132 | Leaf | Positive | GGCGTGGAGAGAGGCGCGGGTGC   | 24 | 110 |
| 1133 | Leaf | Positive | CGTGGAGAGAGGCGCGGGTGC     | 22 | 112 |
| 1134 | Leaf | Positive | GTGGAGAGAGGCGCGGGTGC      | 21 | 113 |
| 1135 | Leaf | Positive | GTGGAGAGAGGCGCGGGTGC      | 21 | 113 |
| 1136 | Leaf | Positive | TGGAGAGAGGCGCGGGTGC       | 21 | 114 |
| 1137 | Leaf | Positive | TGGAGAGAGGCGCGGGTGC       | 21 | 114 |
| 1138 | Leaf | Positive | TGGAGAGAGGCGCGGGTGC       | 21 | 114 |
| 1139 | Leaf | Positive | TGGAGAGAGGCGCGGGTGC       | 21 | 114 |
| 1140 | Leaf | Positive | TGGAGAGAGGCGCGGGTGC       | 21 | 114 |
| 1141 | Leaf | Positive | TGGAGAGAGGCGCGGGTGC       | 21 | 114 |
| 1142 | Leaf | Positive | TGGAGAGAGGCGCGGGTGC       | 21 | 114 |

|      |      |          |                          |    |     |
|------|------|----------|--------------------------|----|-----|
| 1143 | Leaf | Positive | TGGAGAGAGGGCCGCGGTGCT    | 21 | 114 |
| 1144 | Leaf | Positive | TGGAGAGAGGGCCGCGGTGCT    | 21 | 114 |
| 1145 | Leaf | Positive | TGGAGAGAGGGCCGCGGTGCT    | 21 | 114 |
| 1146 | Leaf | Positive | TGGAGAGAGGGCCGCGGTGCT    | 21 | 114 |
| 1147 | Leaf | Positive | TGGAGAGAGGGCCGCGGTGCT    | 21 | 114 |
| 1148 | Leaf | Positive | TGGAGAGAGGGCCGCGGTGCT    | 21 | 114 |
| 1149 | Leaf | Positive | TGGAGAGAGGGCCGCGGTGCT    | 21 | 114 |
| 1150 | Leaf | Positive | TGGAGAGAGGGCCGCGGTGCT    | 21 | 114 |
| 1151 | Leaf | Positive | TGGAGAGAGGGCCGCGGTGCT    | 21 | 114 |
| 1152 | Leaf | Positive | TGGAGAGAGGGCCGCGGTGCT    | 21 | 114 |
| 1153 | Leaf | Positive | TGGAGAGAGGGCCGCGGTGCT    | 21 | 114 |
| 1154 | Leaf | Positive | TGGAGAGAGGGCCGCGGTGCT    | 21 | 114 |
| 1155 | Leaf | Positive | TGGAGAGAGGGCCGCGGTGCT    | 21 | 114 |
| 1156 | Leaf | Positive | TGGAGAGAGGGCCGCGGTGCT    | 21 | 114 |
| 1157 | Leaf | Positive | TGGAGAGAGGGCCGCGGTGCT    | 21 | 114 |
| 1158 | Leaf | Positive | TGGAGAGAGGGCCGCGGTGCT    | 21 | 114 |
| 1159 | Leaf | Positive | TGGAGAGAGGGCCGCGGTGCT    | 21 | 114 |
| 1160 | Leaf | Positive | tgagagagggccgcggtgct     | 21 | 114 |
| 1161 | Leaf | Positive | TGGAGAGAGGGCCGCGGTGCTC   | 22 | 114 |
| 1162 | Leaf | Positive | TGGAGAGAGGGCCGCGGTGCTC   | 22 | 114 |
| 1163 | Leaf | Positive | TGGAGAGAGGGCCGCGGTGCTC   | 22 | 114 |
| 1164 | Leaf | Positive | TGGAGAGAGGGCCGCGGTGCTC   | 22 | 114 |
| 1165 | Leaf | Positive | TGGAGAGAGGGCCGCGGTGCTC   | 22 | 114 |
| 1166 | Leaf | Positive | TGGAGAGAGGGCCGCGGTGCTC   | 22 | 114 |
| 1167 | Leaf | Positive | TGGAGAGAGGGCCGCGGTGCTC   | 22 | 114 |
| 1168 | Leaf | Positive | TGGAGAGAGGGCCGCGGTGCTCTG | 24 | 114 |
| 1169 | Leaf | Positive | TGGAGAGAGGGCCGCGGTGCTCTG | 24 | 114 |
| 1170 | Leaf | Positive | TGGAGAGAGGGCCGCGGTGCTCTG | 24 | 114 |
| 1171 | Leaf | Positive | GGAGAGAGGGCCGCGGTGCTCTGG | 24 | 115 |
| 1172 | Leaf | Positive | gagagagggccgcggtgctct    | 21 | 116 |
| 1173 | Leaf | Positive | GAGAGAGGGCCGCGGTGCTCTG   | 22 | 116 |
| 1174 | Leaf | Positive | AGAGAGGGCCGCGGTGCT       | 18 | 117 |
| 1175 | Leaf | Positive | AGAGAGGGCCGCGGTGCT       | 18 | 117 |
| 1176 | Leaf | Positive | agagagggccgcggtgctct     | 20 | 117 |
| 1177 | Leaf | Positive | AGAGAGGGCCGCGGTGCTCTG    | 21 | 117 |
| 1178 | Leaf | Positive | AGAGAGGGCCGCGGTGCTCTG    | 21 | 117 |
| 1179 | Leaf | Positive | AGAGAGGGCCGCGGTGCTCTG    | 21 | 117 |
| 1180 | Leaf | Positive | AGAGAGGGCCGCGGTGCTCTG    | 21 | 117 |
| 1181 | Leaf | Positive | AGAGAGGGCCGCGGTGCTCTG    | 21 | 117 |
| 1182 | Leaf | Positive | AGAGAGGGCCGCGGTGCTCTG    | 21 | 117 |
| 1183 | Leaf | Positive | AGAGAGGGCCGCGGTGCTCTGG   | 22 | 117 |
| 1184 | Leaf | Positive | agagagggccgcggtgctctgga  | 23 | 117 |
| 1185 | Leaf | Positive | AGAGAGGGCCGCGGTGCTCTGGAG | 24 | 117 |
| 1186 | Leaf | Positive | AGAGAGGGCCGCGGTGCTCTGGAG | 24 | 117 |
| 1187 | Leaf | Positive | AGAGAGGGCCGCGGTGCTCTGGAG | 24 | 117 |
| 1188 | Leaf | Positive | AGAGAGGGCCGCGGTGCTCTGGAG | 24 | 117 |
| 1189 | Leaf | Positive | AGAGAGGGCCGCGGTGCTCTGGAG | 24 | 117 |
| 1190 | Leaf | Positive | AGAGAGGGCCGCGGTGCTCTGGAG | 24 | 117 |
| 1191 | Leaf | Positive | AGAGAGGGCCGCGGTGCTCTGGAG | 24 | 117 |
| 1192 | Leaf | Positive | AGAGAGGGCCGCGGTGCTCTGGAG | 24 | 117 |
| 1193 | Leaf | Positive | AGAGAGGGCCGCGGTGCTCTGGAG | 24 | 117 |
| 1194 | Leaf | Positive | AGAGAGGGCCGCGGTGCTCTGGAG | 24 | 117 |
| 1195 | Leaf | Positive | AGAGAGGGCCGCGGTGCTCTGGAG | 24 | 117 |
| 1196 | Leaf | Positive | AGAGAGGGCCGCGGTGCTCTGGAG | 24 | 117 |
| 1197 | Leaf | Positive | AGAGAGGGCCGCGGTGCTCTGGAG | 24 | 117 |
| 1198 | Leaf | Positive | AGAGAGGGCCGCGGTGCTCTGGAG | 24 | 117 |
| 1199 | Leaf | Positive | AGAGAGGGCCGCGGTGCTCTGGAG | 24 | 117 |
| 1200 | Leaf | Positive | AGAGAGGGCCGCGGTGCTCTGGAG | 24 | 117 |
| 1201 | Leaf | Positive | AGAGAGGGCCGCGGTGCTCTGGAG | 24 | 117 |
| 1202 | Leaf | Positive | AGAGAGGGCCGCGGTGCTCTGGAG | 24 | 117 |
| 1203 | Leaf | Positive | AGAGAGGGCCGCGGTGCTCTGGAG | 24 | 117 |
| 1204 | Leaf | Positive | AGAGAGGGCCGCGGTGCTCTGGAG | 24 | 117 |
| 1205 | Leaf | Positive | AGAGAGGGCCGCGGTGCTCTGGAG | 24 | 117 |
| 1206 | Leaf | Positive | AGAGAGGGCCGCGGTGCTCTGGAG | 24 | 117 |
| 1207 | Leaf | Positive | GAGAGGGCCGCGGTGCTCTGG    | 21 | 118 |
| 1208 | Leaf | Positive | GAGAGGGCCGCGGTGCTCTGG    | 21 | 118 |
| 1209 | Leaf | Positive | GAGAGGGCCGCGGTGCTCTGGAGT | 24 | 118 |
| 1210 | Leaf | Positive | GAGAGGGCCGCGGTGCTCTGGAGT | 24 | 118 |
| 1211 | Leaf | Positive | AGAGGGCCGCGGTGCTCTGGAG   | 22 | 119 |
| 1212 | Leaf | Positive | AGAGGGCCGCGGTGCTCTGGAG   | 22 | 119 |
| 1213 | Leaf | Positive | GAGGGCCGCGGTGCTCTGGAG    | 21 | 120 |
| 1214 | Leaf | Positive | gagggccgcggtgctctggag    | 21 | 120 |
| 1215 | Leaf | Positive | GAGGGCCGCGGTGCTCTGGAGT   | 22 | 120 |
| 1216 | Leaf | Positive | GAGGGCCGCGGTGCTCTGGAGTAG | 24 | 120 |
| 1217 | Leaf | Positive | GAGGGCCGCGGTGCTCTGGAGTAG | 24 | 120 |
| 1218 | Leaf | Positive | ggccgcggtgctctggag       | 18 | 123 |
| 1219 | Leaf | Positive | GGCCGCGGTGCTCTGGAGTAG    | 21 | 123 |
| 1220 | Leaf | Positive | GGCCGCGGTGCTCTGGAGTAG    | 21 | 123 |
| 1221 | Leaf | Positive | GGCCGCGGTGCTCTGGAGTAG    | 21 | 123 |
| 1222 | Leaf | Positive | GCCGCGGTGCTCTGGAGTAGA    | 21 | 124 |
| 1223 | Leaf | Positive | GCCGCGGTGCTCTGGAGTAGAG   | 22 | 124 |
| 1224 | Leaf | Positive | GCCGCGGTGCTCTGGAGTAGAGC  | 24 | 124 |
| 1225 | Leaf | Positive | CCGCGGTGCTCTGGAGTAGAG    | 21 | 125 |
| 1226 | Leaf | Positive | CCGCGGTGCTCTGGAGTAGAG    | 21 | 125 |
| 1227 | Leaf | Positive | CCGCGGTGCTCTGGAGTAGAG    | 21 | 125 |
| 1228 | Leaf | Positive | CCGCGGTGCTCTGGAGTAGAG    | 21 | 125 |
| 1229 | Leaf | Positive | CCGCGGTGCTCTGGAGTAGAG    | 21 | 125 |
| 1230 | Leaf | Positive | CCGCGGTGCTCTGGAGTAGAG    | 21 | 125 |





|      |      |          |                          |    |     |
|------|------|----------|--------------------------|----|-----|
| 1407 | Leaf | Positive | CGGTGCTCTGGAGTAGAGGCTCTG | 24 | 128 |
| 1408 | Leaf | Positive | CGGTGCTCTGGAGTAGAGGCTCTG | 24 | 128 |
| 1409 | Leaf | Positive | gtgctctggagtagagg        | 17 | 130 |
| 1410 | Leaf | Positive | gtgctctggagtagagg        | 17 | 130 |
| 1411 | Leaf | Positive | gtgctctggagtagaggctctg   | 22 | 130 |
| 1412 | Leaf | Positive | gtgctctggagtagaggctctg   | 22 | 130 |
| 1413 | Leaf | Positive | TGCTCTGGAGTAGAGGCTCTGC   | 22 | 131 |
| 1414 | Leaf | Positive | CTCTGGAGTAGAGGCTCTGCC    | 21 | 133 |
| 1415 | Leaf | Positive | CTCTGGAGTAGAGGCTCTGCC    | 22 | 133 |
| 1416 | Leaf | Positive | CTCTGGAGTAGAGGCTCTGCC    | 22 | 133 |
| 1417 | Leaf | Positive | TCTGGAGTAGAGGCTCTGCC     | 21 | 134 |
| 1418 | Leaf | Positive | TCTGGAGTAGAGGCTCTGCC     | 22 | 134 |
| 1419 | Leaf | Positive | TCTGGAGTAGAGGCTCTGCC     | 22 | 134 |
| 1420 | Leaf | Positive | tctggagtagaggctctgcct    | 22 | 134 |
| 1421 | Leaf | Positive | CTGGAGTAGAGGCTCTGCC      | 21 | 135 |
| 1422 | Leaf | Positive | CTGGAGTAGAGGCTCTGCC      | 21 | 135 |
| 1423 | Leaf | Positive | CTGGAGTAGAGGCTCTGCC      | 21 | 135 |
| 1424 | Leaf | Positive | CTGGAGTAGAGGCTCTGCC      | 21 | 135 |
| 1425 | Leaf | Positive | CTGGAGTAGAGGCTCTGCC      | 21 | 135 |
| 1426 | Leaf | Positive | CTGGAGTAGAGGCTCTGCC      | 21 | 135 |
| 1427 | Leaf | Positive | CTGGAGTAGAGGCTCTGCC      | 21 | 135 |
| 1428 | Leaf | Positive | CTGGAGTAGAGGCTCTGCC      | 22 | 135 |
| 1429 | Leaf | Positive | CTGGAGTAGAGGCTCTGCC      | 24 | 135 |
| 1430 | Leaf | Positive | TGGAGTAGAGGCTCTGCC       | 24 | 136 |
| 1431 | Leaf | Positive | GAGTAGAGGCTCTGCC         | 21 | 138 |
| 1432 | Leaf | Positive | GAGTAGAGGCTCTGCC         | 24 | 138 |
| 1433 | Leaf | Positive | agtagaggctctgcct         | 17 | 139 |
| 1434 | Leaf | Positive | AGTAGAGGCTCTGCC          | 23 | 139 |
| 1435 | Leaf | Positive | AGTAGAGGCTCTGCC          | 24 | 139 |
| 1436 | Leaf | Positive | GTAGAGGCTCTGCC           | 23 | 140 |
| 1437 | Leaf | Positive | TAGAGGCTCTGCC            | 21 | 141 |
| 1438 | Leaf | Positive | TAGAGGCTCTGCC            | 21 | 141 |
| 1439 | Leaf | Positive | TAGAGGCTCTGCC            | 21 | 141 |
| 1440 | Leaf | Positive | tagaggctctgcctcgaaac     | 21 | 141 |
| 1441 | Leaf | Positive | TAGAGGCTCTGCC            | 22 | 141 |
| 1442 | Leaf | Positive | TAGAGGCTCTGCC            | 24 | 141 |
| 1443 | Leaf | Positive | TAGAGGCTCTGCC            | 24 | 141 |
| 1444 | Leaf | Positive | AGAGGCTCTGCC             | 24 | 142 |
| 1445 | Leaf | Positive | AGGCTCTGCC               | 24 | 144 |
| 1446 | Leaf | Positive | AGGCTCTGCC               | 24 | 144 |
| 1447 | Leaf | Positive | ggctctgcctcgaaacacca     | 21 | 145 |
| 1448 | Leaf | Positive | ctctgcctcgaaacacca       | 19 | 147 |
| 1449 | Leaf | Positive | CTCTGCC                  | 20 | 147 |
| 1450 | Leaf | Positive | CTCTGCC                  | 21 | 147 |
| 1451 | Leaf | Positive | CTCTGCC                  | 21 | 147 |
| 1452 | Leaf | Positive | CTCTGCC                  | 21 | 147 |
| 1453 | Leaf | Positive | CTCTGCC                  | 21 | 147 |
| 1454 | Leaf | Positive | CTCTGCC                  | 21 | 147 |
| 1455 | Leaf | Positive | CTCTGCC                  | 21 | 147 |
| 1456 | Leaf | Positive | CTCTGCC                  | 21 | 147 |
| 1457 | Leaf | Positive | CTCTGCC                  | 21 | 147 |
| 1458 | Leaf | Positive | CTCTGCC                  | 21 | 147 |
| 1459 | Leaf | Positive | CTCTGCC                  | 24 | 147 |
| 1460 | Leaf | Positive | ctctgcctcgaaacaccatcg    | 24 | 147 |
| 1461 | Leaf | Positive | TCTGCC                   | 21 | 148 |
| 1462 | Leaf | Positive | TCTGCC                   | 21 | 148 |
| 1463 | Leaf | Positive | TCTGCC                   | 21 | 148 |
| 1464 | Leaf | Positive | TCTGCC                   | 21 | 148 |
| 1465 | Leaf | Positive | TCTGCC                   | 21 | 148 |
| 1466 | Leaf | Positive | TCTGCC                   | 21 | 148 |
| 1467 | Leaf | Positive | TCTGCC                   | 21 | 148 |
| 1468 | Leaf | Positive | TCTGCC                   | 21 | 148 |
| 1469 | Leaf | Positive | TCTGCC                   | 21 | 148 |
| 1470 | Leaf | Positive | TCTGCC                   | 22 | 148 |
| 1471 | Leaf | Positive | TCTGCC                   | 22 | 148 |
| 1472 | Leaf | Positive | TCTGCC                   | 22 | 148 |
| 1473 | Leaf | Positive | TCTGCC                   | 22 | 148 |
| 1474 | Leaf | Positive | ctgcctcgaaacacca         | 17 | 149 |
| 1475 | Leaf | Positive | ctgcctcgaaacacca         | 17 | 149 |
| 1476 | Leaf | Positive | ctgcctcgaaacacca         | 17 | 149 |
| 1477 | Leaf | Positive | CTGCC                    | 20 | 149 |
| 1478 | Leaf | Positive | CTGCC                    | 20 | 149 |
| 1479 | Leaf | Positive | ctgcctcgaaacaccatcg      | 20 | 149 |
| 1480 | Leaf | Positive | CTGCC                    | 21 | 149 |
| 1481 | Leaf | Positive | CTGCC                    | 21 | 149 |
| 1482 | Leaf | Positive | CTGCC                    | 21 | 149 |
| 1483 | Leaf | Positive | CTGCC                    | 21 | 149 |
| 1484 | Leaf | Positive | CTGCC                    | 21 | 149 |
| 1485 | Leaf | Positive | CTGCC                    | 21 | 149 |
| 1486 | Leaf | Positive | CTGCC                    | 21 | 149 |
| 1487 | Leaf | Positive | CTGCC                    | 21 | 149 |
| 1488 | Leaf | Positive | CTGCC                    | 21 | 149 |
| 1489 | Leaf | Positive | CTGCC                    | 21 | 149 |
| 1490 | Leaf | Positive | CTGCC                    | 21 | 149 |
| 1491 | Leaf | Positive | CTGCC                    | 21 | 149 |
| 1492 | Leaf | Positive | CTGCC                    | 21 | 149 |
| 1493 | Leaf | Positive | CTGCC                    | 21 | 149 |
| 1494 | Leaf | Positive | CTGCC                    | 21 | 149 |

|      |      |          |                            |    |     |
|------|------|----------|----------------------------|----|-----|
| 1495 | Leaf | Positive | CTGCCTTCGAAACACCATCGA      | 21 | 149 |
| 1496 | Leaf | Positive | CTGCCTTCGAAACACCATCGA      | 21 | 149 |
| 1497 | Leaf | Positive | CTGCCTTCGAAACACCATCGA      | 21 | 149 |
| 1498 | Leaf | Positive | CTGCCTTCGAAACACCATCGA      | 21 | 149 |
| 1499 | Leaf | Positive | CTGCCTTCGAAACACCATCGA      | 21 | 149 |
| 1500 | Leaf | Positive | CTGCCTTCGAAACACCATCGA      | 21 | 149 |
| 1501 | Leaf | Positive | CTGCCTTCGAAACACCATCGAT     | 22 | 149 |
| 1502 | Leaf | Positive | CTGCCTTCGAAACACCATCGAT     | 22 | 149 |
| 1503 | Leaf | Positive | CTGCCTTCGAAACACCATCGATC    | 23 | 149 |
| 1504 | Leaf | Positive | ctgcccttgcgaaacacccatcgatc | 23 | 149 |
| 1505 | Leaf | Positive | CTGCCTTCGAAACACCATCGATCG   | 24 | 149 |
| 1506 | Leaf | Positive | TGCCTTCGAAACACCATCGAT      | 21 | 150 |
| 1507 | Leaf | Positive | TGCCTTCGAAACACCATCGAT      | 21 | 150 |
| 1508 | Leaf | Positive | TGCCTTCGAAACACCATCGATC     | 22 | 150 |
| 1509 | Leaf | Positive | cttgcgaaacacccatcgatcg     | 20 | 153 |
| 1510 | Leaf | Positive | CTTCGAAACACCATCGATCGT      | 21 | 153 |
| 1511 | Leaf | Positive | CTTCGAAACACCATCGATCGTC     | 22 | 153 |
| 1512 | Leaf | Positive | TTTCGAAACACCATCGATCGTCC    | 22 | 154 |
| 1513 | Leaf | Positive | TCGAAACACCATCGATCGTCC      | 21 | 155 |
| 1514 | Leaf | Positive | CGAAACACCATCGATCGTCC       | 20 | 156 |
| 1515 | Leaf | Positive | CGAAACACCATCGATCGTCCC      | 21 | 156 |
| 1516 | Leaf | Positive | CGAAACACCATCGATCGTCCC      | 21 | 156 |
| 1517 | Leaf | Positive | CGAAACACCATCGATCGTCCC      | 21 | 156 |
| 1518 | Leaf | Positive | CGAAACACCATCGATCGTCCC      | 21 | 156 |
| 1519 | Leaf | Positive | AAACACCATCGATCGTCCCTTC     | 22 | 158 |
| 1520 | Leaf | Positive | AAACACCATCGATCGTCCCTTC     | 21 | 159 |
| 1521 | Leaf | Positive | CCATCGATCGTCCCTTCTTCT      | 21 | 163 |
| 1522 | Leaf | Positive | CCATCGATCGTCCCTTCTTCT      | 22 | 163 |
| 1523 | Leaf | Positive | CATCGATCGTCCCTTCTTCT       | 21 | 164 |
| 1524 | Leaf | Positive | TGCATCGTCCCTTCTTCTTTA      | 21 | 166 |
| 1525 | Leaf | Positive | tcgcccccttcttcttacct       | 20 | 170 |
| 1526 | Leaf | Positive | CGTCCCTTCTTCTTTACCTTC      | 21 | 171 |
| 1527 | Leaf | Positive | CCTTCTTCTTACCTTCTTCTG      | 21 | 175 |
| 1528 | Leaf | Positive | CCCTTCTTCTTACCTTCTTCTGGC   | 24 | 175 |
| 1529 | Leaf | Positive | CTTCTTACCTTCTTCTGGCT       | 21 | 179 |
| 1530 | Leaf | Positive | CTTCTTACCTTCTTCTGGCT       | 21 | 179 |
| 1531 | Leaf | Positive | CTTACCTTCTTCTGGCTCTT       | 21 | 182 |
| 1532 | Leaf | Positive | CTTACCTTCTTCTGGCTCTT       | 21 | 182 |
| 1533 | Leaf | Positive | taccttcttctggctct          | 17 | 185 |
| 1534 | Leaf | Positive | TACCTTCTTCTGGCTCTTCTT      | 21 | 185 |
| 1535 | Leaf | Positive | ACCTTCTTCTGGCTTCTTGG       | 21 | 186 |
| 1536 | Leaf | Positive | CCTTCTTCTGGCTTCTTGG        | 21 | 187 |
| 1537 | Leaf | Positive | CCTTCTTCTGGCTTCTTGG        | 21 | 187 |
| 1538 | Leaf | Positive | CTTCTTCTGGCTTCTTGGGA       | 21 | 188 |
| 1539 | Leaf | Positive | CTTCTTCTGGCTTCTTGGGA       | 21 | 188 |
| 1540 | Leaf | Positive | CTTCTTCTGGCTTCTTGGGA       | 21 | 188 |
| 1541 | Leaf | Positive | cttcttctggctcttcttggga     | 21 | 188 |
| 1542 | Leaf | Positive | CTTCTTCTGGCTTCTTGGGAG      | 22 | 188 |
| 1543 | Leaf | Positive | TTCTTCTGGCTTCTTGGGAG       | 21 | 189 |
| 1544 | Leaf | Positive | cttctggctcttcttggga        | 18 | 191 |
| 1545 | Leaf | Positive | CTTCTGGCTTCTTGGGAGAC       | 21 | 191 |
| 1546 | Leaf | Positive | CTTCTGGCTTCTTGGGAGAC       | 21 | 191 |
| 1547 | Leaf | Positive | CTTCTGGCTTCTTGGGAGAC       | 21 | 191 |
| 1548 | Leaf | Positive | CTTCTGGCTTCTTGGGAGAC       | 21 | 191 |
| 1549 | Leaf | Positive | CTTCTGGCTTCTTGGGAGAC       | 21 | 191 |
| 1550 | Leaf | Positive | CTTCTGGCTTCTTGGGAGACG      | 22 | 191 |
| 1551 | Leaf | Positive | TTCTGGCTTCTTGGGAGACG       | 22 | 192 |
| 1552 | Leaf | Positive | CTGGCTTCTTGGGAGACGCG       | 21 | 194 |
| 1553 | Leaf | Positive | CTGGCTTCTTGGGAGACGCGGA     | 22 | 194 |
| 1554 | Leaf | Positive | CTGGCTTCTTGGGAGACGCGACC    | 24 | 194 |
| 1555 | Leaf | Positive | cttcttggagacgagcga         | 18 | 198 |
| 1556 | Leaf | Positive | CTCTTCTTGGGAGACGCGACCG     | 21 | 198 |
| 1557 | Leaf | Positive | CTCTTCTTGGGAGACGCGACCG     | 21 | 198 |
| 1558 | Leaf | Positive | CTCTTCTTGGGAGACGCGACCG     | 21 | 198 |
| 1559 | Leaf | Positive | CTCTTCTTGGGAGACGCGACCG     | 21 | 198 |
| 1560 | Leaf | Positive | CTCTTCTTGGGAGACGCGACCGG    | 22 | 198 |
| 1561 | Leaf | Positive | tcttcttggagacgagcgcg       | 20 | 199 |
| 1562 | Leaf | Positive | TCTTCTTGGGAGACGCGACCGG     | 21 | 199 |
| 1563 | Leaf | Positive | TCTTCTTGGGAGACGCGACCGGT    | 22 | 199 |
| 1564 | Leaf | Positive | TCTTCTTGGGAGACGCGACCGGTG   | 24 | 199 |
| 1565 | Leaf | Positive | CTTCTTGGGAGACGCGACCGGT     | 21 | 200 |
| 1566 | Leaf | Positive | CTTCTTGGGAGACGCGACCGGT     | 21 | 200 |
| 1567 | Leaf | Positive | CTTCTTGGGAGACGCGACCGGT     | 21 | 200 |
| 1568 | Leaf | Positive | CTTCTTGGGAGACGCGACCGGT     | 21 | 200 |
| 1569 | Leaf | Positive | CTTCTTGGGAGACGCGACCGGTG    | 22 | 200 |
| 1570 | Leaf | Positive | CTTCTTGGGAGACGCGACCGGTG    | 23 | 200 |
| 1571 | Leaf | Positive | CTTCTTGGGAGACGCGACCGGTGG   | 24 | 200 |
| 1572 | Leaf | Positive | TTCTTGGGAGACGCGACCGGTG     | 21 | 201 |
| 1573 | Leaf | Positive | TTCTTGGGAGACGCGACCGGTG     | 21 | 201 |
| 1574 | Leaf | Positive | TTCTTGGGAGACGCGACCGGTG     | 21 | 201 |
| 1575 | Leaf | Positive | TTCTTGGGAGACGCGACCGGTG     | 21 | 201 |
| 1576 | Leaf | Positive | TTCTTGGGAGACGCGACCGGTG     | 21 | 201 |
| 1577 | Leaf | Positive | TTCTTGGGAGACGCGACCGGTGG    | 22 | 201 |
| 1578 | Leaf | Positive | TTCTTGGGAGACGCGACCGGTGG    | 22 | 201 |
| 1579 | Leaf | Positive | TTCTTGGGAGACGCGACCGGTGG    | 22 | 201 |
| 1580 | Leaf | Positive | TCTTGGGAGACGCGAC           | 15 | 202 |
| 1581 | Leaf | Positive | TCTTGGGAGACGCGACCGGTGG     | 21 | 202 |
| 1582 | Leaf | Positive | cttggagacgagcgcggtgg       | 20 | 203 |

|      |      |          |                          |    |     |
|------|------|----------|--------------------------|----|-----|
| 1583 | Leaf | Positive | CTTGAGACGCGACCGGTGGC     | 21 | 203 |
| 1584 | Leaf | Positive | ctggagacgcgaccggtggc     | 21 | 203 |
| 1585 | Leaf | Positive | TTGGAGACGCGACCGGTGGCA    | 21 | 204 |
| 1586 | Leaf | Positive | TTGGAGACGCGACCGGTGGCA    | 21 | 204 |
| 1587 | Leaf | Positive | TTGGAGACGCGACCGGTGGCA    | 21 | 204 |
| 1588 | Leaf | Positive | TTGGAGACGCGACCGGTGGCA    | 21 | 204 |
| 1589 | Leaf | Positive | TTGGAGACGCGACCGGTGGCA    | 21 | 204 |
| 1590 | Leaf | Positive | TTGGAGACGCGACCGGTGGCA    | 21 | 204 |
| 1591 | Leaf | Positive | TTGGAGACGCGACCGGTGGCA    | 21 | 204 |
| 1592 | Leaf | Positive | TTGGAGACGCGACCGGTGGCAC   | 22 | 204 |
| 1593 | Leaf | Positive | GACGCGACCGGTGGCACCCC     | 20 | 209 |
| 1594 | Leaf | Positive | CGCGACCGGTGGCACCCCTGC    | 21 | 211 |
| 1595 | Leaf | Positive | CGCGACCGGTGGCACCCCTGC    | 21 | 211 |
| 1596 | Leaf | Positive | CGACCGGTGGCACCCCTGC      | 19 | 213 |
| 1597 | Leaf | Positive | CGACCGGTGGCACCCCTGCTCG   | 22 | 213 |
| 1598 | Leaf | Positive | CGACCGGTGGCACCCCTGCTCGG  | 23 | 213 |
| 1599 | Leaf | Positive | CGACCGGTGGCACCCCTGCTCGGT | 24 | 213 |
| 1600 | Leaf | Positive | CGACCGGTGGCACCCCTGCTCGGT | 24 | 213 |
| 1601 | Leaf | Positive | CCGGTGGCACCCCTGCTCGGT    | 21 | 216 |
| 1602 | Leaf | Positive | CCGGTGGCACCCCTGCTCGGT    | 21 | 216 |
| 1603 | Leaf | Positive | CCGGTGGCACCCCTGCTCGGT    | 21 | 216 |
| 1604 | Leaf | Positive | CCGGTGGCACCCCTGCTCGGTT   | 22 | 216 |
| 1605 | Leaf | Positive | CCGGTGGCACCCCTGCTCGGTT   | 22 | 217 |
| 1606 | Leaf | Positive | CCGGTGGCACCCCTGCTCGGTT   | 22 | 217 |
| 1607 | Leaf | Positive | CCTGCTCGGTTGCTCCAACCTG   | 23 | 227 |
| 1608 | Leaf | Positive | TGCTCGGTTGCTCCAACCTG     | 21 | 229 |
| 1609 | Leaf | Positive | CTCGGTTGCTCCAACCTGCT     | 21 | 231 |
| 1610 | Leaf | Positive | ttcgctccaacctgctt        | 17 | 236 |
| 1611 | Leaf | Positive | TTGCTCCAACCTGCTTTTGT     | 21 | 236 |
| 1612 | Leaf | Positive | TGCTCCAACCTGCTTTTGT      | 21 | 237 |
| 1613 | Leaf | Positive | TGCTCCAACCTGCTTTTGT      | 21 | 237 |
| 1614 | Leaf | Positive | TGCTCCAACCTGCTTTTGT      | 22 | 237 |
| 1615 | Leaf | Positive | CGCTCCAACCTGCTTTTGT      | 21 | 238 |
| 1616 | Leaf | Positive | CGCTCCAACCTGCTTTTGT      | 21 | 238 |
| 1617 | Leaf | Positive | CGCTCCAACCTGCTTTTGT      | 22 | 238 |
| 1618 | Leaf | Positive | CTCCAACCTGCTTTTGT        | 21 | 240 |
| 1619 | Leaf | Positive | CTCCAACCTGCTTTTGT        | 21 | 240 |
| 1620 | Leaf | Positive | CTCCAACCTGCTTTTGT        | 21 | 240 |
| 1621 | Leaf | Positive | CTCCAACCTGCTTTTGT        | 21 | 240 |
| 1622 | Leaf | Positive | CTCCAACCTGCTTTTGT        | 21 | 240 |
| 1623 | Leaf | Positive | CTCCAACCTGCTTTTGT        | 21 | 240 |
| 1624 | Leaf | Positive | CTCCAACCTGCTTTTGT        | 21 | 240 |
| 1625 | Leaf | Positive | TCCAACCTGCTTTTGT         | 21 | 241 |
| 1626 | Leaf | Positive | TCCAACCTGCTTTTGT         | 22 | 241 |
| 1627 | Leaf | Positive | CCAACCTGCTTTTGT          | 21 | 242 |
| 1628 | Leaf | Positive | CCAACCTGCTTTTGT          | 21 | 242 |
| 1629 | Leaf | Positive | CCAACCTGCTTTTGT          | 22 | 242 |
| 1630 | Leaf | Positive | CAACCTGCTTTTGT           | 21 | 243 |
| 1631 | Leaf | Positive | CAACCTGCTTTTGT           | 21 | 243 |
| 1632 | Leaf | Positive | CAACCTGCTTTTGT           | 22 | 243 |
| 1633 | Leaf | Positive | CAACCTGCTTTTGT           | 22 | 243 |
| 1634 | Leaf | Positive | CAACCTGCTTTTGT           | 23 | 243 |
| 1635 | Leaf | Positive | AACCTGCTTTTGT            | 18 | 244 |
| 1636 | Leaf | Positive | AACCTGCTTTTGT            | 21 | 244 |
| 1637 | Leaf | Positive | AACCTGCTTTTGT            | 21 | 244 |
| 1638 | Leaf | Positive | AACCTGCTTTTGT            | 22 | 244 |
| 1639 | Leaf | Positive | AACCTGCTTTTGT            | 24 | 244 |
| 1640 | Leaf | Positive | ACCTGCTTTTGT             | 21 | 245 |
| 1641 | Leaf | Positive | ACCTGCTTTTGT             | 21 | 245 |
| 1642 | Leaf | Positive | ACCTGCTTTTGT             | 24 | 245 |
| 1643 | Leaf | Positive | ACCTGCTTTTGT             | 24 | 245 |
| 1644 | Leaf | Positive | CCTGCTTTTGT              | 21 | 246 |
| 1645 | Leaf | Positive | CCTGCTTTTGT              | 21 | 246 |
| 1646 | Leaf | Positive | CCTGCTTTTGT              | 21 | 246 |
| 1647 | Leaf | Positive | CCTGCTTTTGT              | 22 | 246 |
| 1648 | Leaf | Positive | CCTGCTTTTGT              | 22 | 246 |
| 1649 | Leaf | Positive | CCTGCTTTTGT              | 22 | 246 |
| 1650 | Leaf | Positive | ctgctttgtctatct          | 17 | 247 |
| 1651 | Leaf | Positive | CTGCTTTTGT               | 21 | 247 |
| 1652 | Leaf | Positive | CTGCTTTTGT               | 21 | 247 |
| 1653 | Leaf | Positive | CTGCTTTTGT               | 21 | 247 |
| 1654 | Leaf | Positive | CTGCTTTTGT               | 21 | 247 |
| 1655 | Leaf | Positive | CTGCTTTTGT               | 21 | 247 |
| 1656 | Leaf | Positive | CTGCTTTTGT               | 21 | 247 |
| 1657 | Leaf | Positive | CTGCTTTTGT               | 21 | 247 |
| 1658 | Leaf | Positive | CTGCTTTTGT               | 21 | 247 |
| 1659 | Leaf | Positive | CTGCTTTTGT               | 21 | 247 |
| 1660 | Leaf | Positive | CTGCTTTTGT               | 21 | 247 |
| 1661 | Leaf | Positive | CTGCTTTTGT               | 21 | 247 |
| 1662 | Leaf | Positive | CTGCTTTTGT               | 22 | 247 |
| 1663 | Leaf | Positive | TGCTTTTGT                | 21 | 248 |
| 1664 | Leaf | Positive | TGCTTTTGT                | 21 | 248 |
| 1665 | Leaf | Positive | TGCTTTTGT                | 21 | 248 |
| 1666 | Leaf | Positive | TGCTTTTGT                | 21 | 248 |
| 1667 | Leaf | Positive | TGCTTTTGT                | 21 | 248 |
| 1668 | Leaf | Positive | TGCTTTTGT                | 22 | 248 |
| 1669 | Leaf | Positive | TGCTTTTGT                | 22 | 248 |
| 1670 | Leaf | Positive | TGCTTTTGT                | 22 | 248 |



|      |      |          |                          |    |     |
|------|------|----------|--------------------------|----|-----|
| 1759 | Leaf | Positive | TGTTCTATCTGCGCCTCTGCC    | 21 | 254 |
| 1760 | Leaf | Positive | TGTTCTATCTGCGCCTCTGCC    | 21 | 254 |
| 1761 | Leaf | Positive | TGTTCTATCTGCGCCTCTGCC    | 21 | 254 |
| 1762 | Leaf | Positive | TGTTCTATCTGCGCCTCTGCCG   | 22 | 254 |
| 1763 | Leaf | Positive | TGTTCTATCTGCGCCTCTGCCG   | 22 | 254 |
| 1764 | Leaf | Positive | TGTTCTATCTGCGCCTCTGCCG   | 22 | 254 |
| 1765 | Leaf | Positive | TTCTATCTGCGCCTCTGCCGC    | 21 | 256 |
| 1766 | Leaf | Positive | TTCTATCTGCGCCTCTGCCGC    | 21 | 256 |
| 1767 | Leaf | Positive | TTCTATCTGCGCCTCTGCCGC    | 21 | 256 |
| 1768 | Leaf | Positive | TTCTATCTGCGCCTCTGCCGC    | 21 | 256 |
| 1769 | Leaf | Positive | ctatctgCGCCTctGCC        | 17 | 258 |
| 1770 | Leaf | Positive | CTATCTGCGCCTCTGCCGCGG    | 21 | 258 |
| 1771 | Leaf | Positive | CTATCTGCGCCTCTGCCGCGG    | 21 | 258 |
| 1772 | Leaf | Positive | CTATCTGCGCCTCTGCCGCGG    | 21 | 258 |
| 1773 | Leaf | Positive | CTATCTGCGCCTCTGCCGCGG    | 21 | 258 |
| 1774 | Leaf | Positive | CTATCTGCGCCTCTGCCGCGG    | 21 | 258 |
| 1775 | Leaf | Positive | CTATCTGCGCCTCTGCCGCGG    | 21 | 258 |
| 1776 | Leaf | Positive | CTATCTGCGCCTCTGCCGCGG    | 21 | 258 |
| 1777 | Leaf | Positive | TATCTGCGCCTCTGCCGCGGA    | 21 | 259 |
| 1778 | Leaf | Positive | CTGCGCCTCTGCCGCGGATC     | 20 | 262 |
| 1779 | Leaf | Positive | CTGCGCCTCTGCCGCGGATCC    | 21 | 262 |
| 1780 | Leaf | Positive | CTGCGCCTCTGCCGCGGATCC    | 21 | 262 |
| 1781 | Leaf | Positive | CTGCGCCTCTGCCGCGGATCCT   | 22 | 262 |
| 1782 | Leaf | Positive | TGCGCCTCTGCCGCGGATCCT    | 21 | 263 |
| 1783 | Leaf | Positive | TGCGCCTCTGCCGCGGATCCTC   | 22 | 263 |
| 1784 | Leaf | Positive | cgCCTctGCCGCGGATC        | 17 | 265 |
| 1785 | Leaf | Positive | CGCCTCTGCCGCGGATCCTCT    | 21 | 265 |
| 1786 | Leaf | Positive | CGCCTCTGCCGCGGATCCTCT    | 21 | 265 |
| 1787 | Leaf | Positive | CGCCTCTGCCGCGGATCCTCT    | 21 | 265 |
| 1788 | Leaf | Positive | CGCCTCTGCCGCGGATCCTCT    | 21 | 265 |
| 1789 | Leaf | Positive | CGCCTCTGCCGCGGATCCTCTC   | 22 | 265 |
| 1790 | Leaf | Positive | CGCCTCTGCCGCGGATCCTCTCT  | 24 | 265 |
| 1791 | Leaf | Positive | GCCTCTGCCGCGGATCCTCTCTTG | 24 | 266 |
| 1792 | Leaf | Positive | CCTCTGCCGCGGATCCTCTCT    | 21 | 267 |
| 1793 | Leaf | Positive | CCTCTGCCGCGGATCCTCTCTT   | 22 | 267 |
| 1794 | Leaf | Positive | TCTGCCGCGGATCCTCTCTTG    | 21 | 269 |
| 1795 | Leaf | Positive | CTGCCGCGGATCCTCTCTTGA    | 21 | 270 |
| 1796 | Leaf | Positive | CTGCCGCGGATCCTCTCTTGA    | 21 | 270 |
| 1797 | Leaf | Positive | CTGCCGCGGATCCTCTCTTGA    | 21 | 270 |
| 1798 | Leaf | Positive | CTGCCGCGGATCCTCTCTTGA    | 21 | 270 |
| 1799 | Leaf | Positive | CTGCCGCGGATCCTCTCTTGA    | 21 | 270 |
| 1800 | Leaf | Positive | CTGCCGCGGATCCTCTCTTGA    | 21 | 270 |
| 1801 | Leaf | Positive | CTGCCGCGGATCCTCTCTTGA    | 21 | 270 |
| 1802 | Leaf | Positive | CTGCCGCGGATCCTCTCTTGA    | 22 | 270 |
| 1803 | Leaf | Positive | CTGCCGCGGATCCTCTCTTGA    | 22 | 270 |
| 1804 | Leaf | Positive | CCGCGGATCCTCTCTTGA       | 22 | 273 |
| 1805 | Leaf | Positive | CCGCGGATCCTCTCTTGA       | 22 | 273 |
| 1806 | Leaf | Positive | CCTCTCTTGA               | 21 | 281 |
| 1807 | Leaf | Positive | AGCCCTCTGGGGAATTCTCGAGT  | 24 | 290 |
| 1808 | Leaf | Positive | CCCTCTGGGGAATTCTCGAG     | 21 | 292 |
| 1809 | Leaf | Positive | ctctggggaattctcgag       | 17 | 295 |
| 1810 | Leaf | Positive | CTCTGGGGAATTCTCGAGTTG    | 21 | 295 |
| 1811 | Leaf | Positive | CTCTGGGGAATTCTCGAGTTG    | 21 | 295 |
| 1812 | Leaf | Positive | CTCTGGGGAATTCTCGAGTTG    | 21 | 295 |
| 1813 | Leaf | Positive | CTCTGGGGAATTCTCGAGTTG    | 21 | 295 |
| 1814 | Leaf | Positive | CTCTGGGGAATTCTCGAGTTG    | 21 | 295 |
| 1815 | Leaf | Positive | CTCTGGGGAATTCTCGAGTTG    | 21 | 295 |
| 1816 | Leaf | Positive | CTCTGGGGAATTCTCGAGTTG    | 21 | 295 |
| 1817 | Leaf | Positive | CTCTGGGGAATTCTCGAGTTG    | 21 | 295 |
| 1818 | Leaf | Positive | CTCTGGGGAATTCTCGAGTTG    | 21 | 295 |
| 1819 | Leaf | Positive | CTCTGGGGAATTCTCGAGTTG    | 21 | 295 |
| 1820 | Leaf | Positive | CTCTGGGGAATTCTCGAGTTG    | 21 | 295 |
| 1821 | Leaf | Positive | CTCTGGGGAATTCTCGAGTTG    | 21 | 295 |
| 1822 | Leaf | Positive | CTCTGGGGAATTCTCGAGTTGC   | 22 | 295 |
| 1823 | Leaf | Positive | CTCTGGGGAATTCTCGAGTTGC   | 22 | 295 |
| 1824 | Leaf | Positive | CTCTGGGGAATTCTCGAGTTGC   | 22 | 295 |
| 1825 | Leaf | Positive | CTCTGGGGAATTCTCGAGTTGC   | 22 | 295 |
| 1826 | Leaf | Positive | CTCTGGGGAATTCTCGAGTTGC   | 22 | 295 |
| 1827 | Leaf | Positive | CTCTGGGGAATTCTCGAGTTGC   | 22 | 295 |
| 1828 | Leaf | Positive | CTCTGGGGAATTCTCGAGTTGC   | 22 | 295 |
| 1829 | Leaf | Positive | CTCTGGGGAATTCTCGAGTTGC   | 22 | 295 |
| 1830 | Leaf | Positive | CTCTGGGGAATTCTCGAGTTGC   | 22 | 295 |
| 1831 | Leaf | Positive | CTCTGGGGAATTCTCGAGTTGC   | 22 | 295 |
| 1832 | Leaf | Positive | ctctggggaattctcgagttgc   | 22 | 295 |
| 1833 | Leaf | Positive | CTCTGGGGAATTCTCGAGTTGCCG | 24 | 295 |
| 1834 | Leaf | Positive | CTCTGGGGAATTCTCGAGTTGCCG | 24 | 295 |
| 1835 | Leaf | Positive | TCTGGGGAATTCTCGAGTTGC    | 21 | 296 |
| 1836 | Leaf | Positive | TCTGGGGAATTCTCGAGTTGC    | 21 | 296 |
| 1837 | Leaf | Positive | TCTGGGGAATTCTCGAGTTGC    | 21 | 296 |
| 1838 | Leaf | Positive | TCTGGGGAATTCTCGAGTTGC    | 21 | 296 |
| 1839 | Leaf | Positive | TCTGGGGAATTCTCGAGTTGC    | 21 | 296 |
| 1840 | Leaf | Positive | TCTGGGGAATTCTCGAGTTGC    | 21 | 296 |
| 1841 | Leaf | Positive | TCTGGGGAATTCTCGAGTTGC    | 21 | 296 |
| 1842 | Leaf | Positive | TCTGGGGAATTCTCGAGTTGC    | 21 | 296 |
| 1843 | Leaf | Positive | TCTGGGGAATTCTCGAGTTGC    | 21 | 296 |
| 1844 | Leaf | Positive | TCTGGGGAATTCTCGAGTTGC    | 21 | 296 |
| 1845 | Leaf | Positive | TCTGGGGAATTCTCGAGTTGC    | 21 | 296 |
| 1846 | Leaf | Positive | TCTGGGGAATTCTCGAGTTGC    | 21 | 296 |



|      |      |          |                                    |    |    |
|------|------|----------|------------------------------------|----|----|
| 1935 | Leaf | Negative | ttgcggaactcgagaattcc               | 21 | 5  |
| 1936 | Leaf | Negative | ttgcggaactcgagaattcc               | 21 | 5  |
| 1937 | Leaf | Negative | ttgcggaactcgagaattcc               | 21 | 5  |
| 1938 | Leaf | Negative | ttgcggaactcgagaattcc               | 21 | 5  |
| 1939 | Leaf | Negative | ttgcggaactcgagaattcc               | 21 | 5  |
| 1940 | Leaf | Negative | ttgcggaactcgagaattcc               | 21 | 5  |
| 1941 | Leaf | Negative | ttgcggaactcgagaattcc               | 21 | 5  |
| 1942 | Leaf | Negative | ttgcggaactcgagaattcc               | 21 | 5  |
| 1943 | Leaf | Negative | tttgcggcaactcgagaattc              | 21 | 6  |
| 1944 | Leaf | Negative | ttttgcggcaactcgagaatt              | 21 | 7  |
| 1945 | Leaf | Negative | ttttgcggcaactcgagaatt              | 21 | 7  |
| 1946 | Leaf | Negative | ttttgcggcaactcgagaatt              | 21 | 7  |
| 1947 | Leaf | Negative | ttttgcggcaactcgagaatt              | 20 | 8  |
| 1948 | Leaf | Negative | cttttgcggcaactcgagaat              | 21 | 8  |
| 1949 | Leaf | Negative | cttttgcggcaactcgagaat              | 21 | 8  |
| 1950 | Leaf | Negative | tttgcggcaactcgagaa                 | 18 | 9  |
| 1951 | Leaf | Negative | ccctttgcggcaactcgagaa              | 21 | 9  |
| 1952 | Leaf | Negative | ccctttgcggcaactcgagaa              | 21 | 9  |
| 1953 | Leaf | Negative | ccctttgcggcaactcgagaa              | 21 | 9  |
| 1954 | Leaf | Negative | ccctttgcggcaactcgagaa              | 21 | 9  |
| 1955 | Leaf | Negative | ccctttgcggcaactcgagaa              | 21 | 9  |
| 1956 | Leaf | Negative | ccctttgcggcaactcgagaa              | 21 | 9  |
| 1957 | Leaf | Negative | ccctttgcggcaactcgagaa              | 21 | 9  |
| 1958 | Leaf | Negative | ccctttgcggcaactcgagaa              | 21 | 9  |
| 1959 | Leaf | Negative | ccctttgcggcaactcgagaa              | 21 | 9  |
| 1960 | Leaf | Negative | ccctttgcggcaactcgagaa              | 21 | 9  |
| 1961 | Leaf | Negative | ccctttgcggcaactcgagaa              | 21 | 9  |
| 1962 | Leaf | Negative | ccctttgcggcaactcgagaa              | 21 | 9  |
| 1963 | Leaf | Negative | catgaccttttgcggcaactcgaga          | 24 | 10 |
| 1964 | Leaf | Negative | gcatgaccttttgcggcaactcgaga         | 24 | 11 |
| 1965 | Leaf | Negative | catgaccttttgcggcaactcgaga          | 22 | 12 |
| 1966 | Leaf | Negative | catgaccttttgcggcaactcgaga          | 22 | 12 |
| 1967 | Leaf | Negative | ccctttgcggcaactcg                  | 17 | 13 |
| 1968 | Leaf | Negative | catgaccttttgcggcaactcg             | 21 | 13 |
| 1969 | Leaf | Negative | catgaccttttgcggcaactcg             | 21 | 13 |
| 1970 | Leaf | Negative | tttgcgatgaccttttgcggcaac           | 22 | 16 |
| 1971 | Leaf | Negative | tttgcgatgaccttttgcggcaac           | 22 | 16 |
| 1972 | Leaf | Negative | tttgcgatgaccttttgcggcaac           | 21 | 17 |
| 1973 | Leaf | Negative | ctttgcgatgaccttttgcggcaac          | 22 | 17 |
| 1974 | Leaf | Negative | ctttgcgatgaccttttgcggcaac          | 21 | 18 |
| 1975 | Leaf | Negative | ctttgcgatgaccttttgcggcaac          | 21 | 18 |
| 1976 | Leaf | Negative | ctttgcgatgaccttttgcggcaac          | 21 | 18 |
| 1977 | Leaf | Negative | tctttgcgatgaccttttgcggcaac         | 21 | 19 |
| 1978 | Leaf | Negative | tctttgcgatgaccttttgcggcaac         | 21 | 19 |
| 1979 | Leaf | Negative | tctttgcgatgaccttttgcggcaac         | 22 | 19 |
| 1980 | Leaf | Negative | tttgcgatgaccttttgcgg               | 18 | 20 |
| 1981 | Leaf | Negative | ctttgcgatgaccttttgcgg              | 19 | 20 |
| 1982 | Leaf | Negative | ttctttgcgatgaccttttgcgg            | 21 | 20 |
| 1983 | Leaf | Negative | ttttctttgcgatgaccttttgcgg          | 24 | 20 |
| 1984 | Leaf | Negative | tttctttgcgatgaccttttgc             | 21 | 22 |
| 1985 | Leaf | Negative | tttctttgcgatgaccttttgc             | 21 | 22 |
| 1986 | Leaf | Negative | tttctttgcgatgaccttttgc             | 21 | 22 |
| 1987 | Leaf | Negative | tttctttgcgatgaccttttgc             | 21 | 22 |
| 1988 | Leaf | Negative | tttctttgcgatgaccttttgc             | 21 | 22 |
| 1989 | Leaf | Negative | ttttctttgcgatgaccttttgc            | 22 | 22 |
| 1990 | Leaf | Negative | ttttctttgcgatgaccttttgc            | 22 | 22 |
| 1991 | Leaf | Negative | ttttctttgcgatgaccttttgc            | 22 | 22 |
| 1992 | Leaf | Negative | ttttctttgcgatgaccttttgc            | 21 | 23 |
| 1993 | Leaf | Negative | ttttctttgcgatgaccttttgc            | 21 | 23 |
| 1994 | Leaf | Negative | ttttctttgcgatgaccttttgc            | 21 | 23 |
| 1995 | Leaf | Negative | ttttctttgcgatgaccttttgc            | 21 | 23 |
| 1996 | Leaf | Negative | ttttctttgcgatgaccttttgc            | 19 | 25 |
| 1997 | Leaf | Negative | agttttctttgcgatgaccttttgc          | 21 | 26 |
| 1998 | Leaf | Negative | agttttctttgcgatgaccttttgc          | 20 | 27 |
| 1999 | Leaf | Negative | ctgcctagttttctttgc                 | 20 | 33 |
| 2000 | Leaf | Negative | cctgcctagttttctttgc                | 21 | 33 |
| 2001 | Leaf | Negative | cctgcctagttttctttgc                | 20 | 34 |
| 2002 | Leaf | Negative | cctgcctagttttctttgc                | 20 | 34 |
| 2003 | Leaf | Negative | cctgcctagttttctttgc                | 20 | 34 |
| 2004 | Leaf | Negative | cctgcctagttttctttgc                | 20 | 34 |
| 2005 | Leaf | Negative | cctgcctagttttctttgc                | 20 | 34 |
| 2006 | Leaf | Negative | agcacctcctgcctagttttgc             | 21 | 41 |
| 2007 | Leaf | Negative | taagcacctcctgcctagttttgc           | 22 | 42 |
| 2008 | Leaf | Negative | caggtaagcacctcctgcctagttttgc       | 22 | 46 |
| 2009 | Leaf | Negative | ctcaggttaagcacctcctgcctagttttgc    | 24 | 46 |
| 2010 | Leaf | Negative | ctcaggttaagcacctcctgcctagttttgc    | 24 | 46 |
| 2011 | Leaf | Negative | tcaggttaagcacctcctgcctagttttgc     | 22 | 47 |
| 2012 | Leaf | Negative | ctcaggttaagcacctcctgcctagttttgc    | 22 | 48 |
| 2013 | Leaf | Negative | ctcaggttaagcacctcctgcctagttttgc    | 22 | 48 |
| 2014 | Leaf | Negative | ttctcaggttaagcacctcctgcctagttttgc  | 24 | 48 |
| 2015 | Leaf | Negative | ttctcaggttaagcacctcctgcctagttttgc  | 24 | 48 |
| 2016 | Leaf | Negative | ctcaggttaagcacctcctgcctagttttgc    | 21 | 49 |
| 2017 | Leaf | Negative | ctcaggttaagcacctcctgcctagttttgc    | 21 | 49 |
| 2018 | Leaf | Negative | ctcaggttaagcacctcctgcctagttttgc    | 21 | 49 |
| 2019 | Leaf | Negative | ctcaggttaagcacctcctgcctagttttgc    | 21 | 49 |
| 2020 | Leaf | Negative | ctcaggttaagcacctcctgcctagttttgc    | 21 | 49 |
| 2021 | Leaf | Negative | tttctcaggttaagcacctcctgcctagttttgc | 24 | 49 |
| 2022 | Leaf | Negative | tttctcaggttaagcacctcctgcctagttttgc | 22 | 50 |





|      |      |          |                         |    |    |
|------|------|----------|-------------------------|----|----|
| 2199 | Leaf | Negative | ctcctttcaggttaagcacc    | 22 | 55 |
| 2200 | Leaf | Negative | tttctcaggttaagcacc      | 17 | 56 |
| 2201 | Leaf | Negative | tttctcaggttaagcacc      | 17 | 56 |
| 2202 | Leaf | Negative | tttctcaggttaagcacc      | 17 | 56 |
| 2203 | Leaf | Negative | ctcctttcaggttaagcacc    | 21 | 56 |
| 2204 | Leaf | Negative | ctcctttcaggttaagcacc    | 21 | 56 |
| 2205 | Leaf | Negative | ctcctttcaggttaagcacc    | 21 | 56 |
| 2206 | Leaf | Negative | ctcctttcaggttaagcacc    | 21 | 56 |
| 2207 | Leaf | Negative | ctcctttcaggttaagcacc    | 21 | 56 |
| 2208 | Leaf | Negative | ctcctttcaggttaagcacc    | 21 | 56 |
| 2209 | Leaf | Negative | ctcctttcaggttaagcacc    | 21 | 56 |
| 2210 | Leaf | Negative | ctcctttcaggttaagcacc    | 21 | 56 |
| 2211 | Leaf | Negative | ctcctttcaggttaagcacc    | 21 | 56 |
| 2212 | Leaf | Negative | gctcctttcaggttaagcacc   | 22 | 56 |
| 2213 | Leaf | Negative | cttctcaggttaagcac       | 17 | 57 |
| 2214 | Leaf | Negative | cttctcaggttaagcac       | 18 | 57 |
| 2215 | Leaf | Negative | cttctcaggttaagcac       | 18 | 57 |
| 2216 | Leaf | Negative | cttctcaggttaagcac       | 18 | 57 |
| 2217 | Leaf | Negative | tcctttcaggttaagcac      | 19 | 57 |
| 2218 | Leaf | Negative | tcctttcaggttaagcac      | 19 | 57 |
| 2219 | Leaf | Negative | cttctcaggttaagca        | 17 | 58 |
| 2220 | Leaf | Negative | tcctttcaggttaagca       | 18 | 58 |
| 2221 | Leaf | Negative | tcctttcaggttaagca       | 18 | 58 |
| 2222 | Leaf | Negative | ggggctcctttcaggttaagca  | 23 | 58 |
| 2223 | Leaf | Negative | cggggctcctttcaggttaagca | 24 | 58 |
| 2224 | Leaf | Negative | gggctcctttcaggttaagc    | 21 | 59 |
| 2225 | Leaf | Negative | gggctcctttcaggttaagc    | 21 | 59 |
| 2226 | Leaf | Negative | cggggctcctttcaggttaagc  | 23 | 59 |
| 2227 | Leaf | Negative | cggggctcctttcaggttaagc  | 23 | 59 |
| 2228 | Leaf | Negative | cggggctcctttcaggttaagc  | 23 | 59 |
| 2229 | Leaf | Negative | cggggctcctttcaggttaagc  | 23 | 59 |
| 2230 | Leaf | Negative | ccggggctcctttcaggttaagc | 23 | 59 |
| 2231 | Leaf | Negative | ccggggctcctttcaggttaagc | 23 | 59 |
| 2232 | Leaf | Negative | ccggggctcctttcaggttaagc | 24 | 59 |
| 2233 | Leaf | Negative | ccggggctcctttcaggttaagc | 24 | 59 |
| 2234 | Leaf | Negative | ccggggctcctttcaggttaagc | 24 | 59 |
| 2235 | Leaf | Negative | ggggctcctttcaggttaag    | 21 | 60 |
| 2236 | Leaf | Negative | ggggctcctttcaggttaag    | 21 | 60 |
| 2237 | Leaf | Negative | ggggctcctttcaggttaag    | 21 | 60 |
| 2238 | Leaf | Negative | cggggctcctttcaggttaag   | 22 | 60 |
| 2239 | Leaf | Negative | cggggctcctttcaggttaag   | 22 | 60 |
| 2240 | Leaf | Negative | cggggctcctttcaggttaag   | 22 | 60 |
| 2241 | Leaf | Negative | cggggctcctttcaggttaag   | 22 | 60 |
| 2242 | Leaf | Negative | cggggctcctttcaggttaag   | 22 | 60 |
| 2243 | Leaf | Negative | cggggctcctttcaggttaag   | 22 | 60 |
| 2244 | Leaf | Negative | cggggctcctttcaggttaag   | 22 | 60 |
| 2245 | Leaf | Negative | cggggctcctttcaggttaag   | 22 | 60 |
| 2246 | Leaf | Negative | cggggctcctttcaggttaag   | 22 | 60 |
| 2247 | Leaf | Negative | cggggctcctttcaggttaag   | 22 | 60 |
| 2248 | Leaf | Negative | cggggctcctttcaggttaag   | 22 | 60 |
| 2249 | Leaf | Negative | cggggctcctttcaggttaag   | 22 | 60 |
| 2250 | Leaf | Negative | cggggctcctttcaggttaag   | 22 | 60 |
| 2251 | Leaf | Negative | cggggctcctttcaggttaag   | 22 | 60 |
| 2252 | Leaf | Negative | cggggctcctttcaggttaag   | 22 | 60 |
| 2253 | Leaf | Negative | cggggctcctttcaggttaag   | 22 | 60 |
| 2254 | Leaf | Negative | cggggctcctttcaggttaag   | 22 | 60 |
| 2255 | Leaf | Negative | cggggctcctttcaggttaag   | 22 | 60 |
| 2256 | Leaf | Negative | cggggctcctttcaggttaag   | 22 | 60 |
| 2257 | Leaf | Negative | ccggggctcctttcaggttaag  | 23 | 60 |
| 2258 | Leaf | Negative | ccggggctcctttcaggttaag  | 23 | 60 |
| 2259 | Leaf | Negative | gggctcctttcaggttaa      | 19 | 61 |
| 2260 | Leaf | Negative | cggggctcctttcaggttaa    | 21 | 61 |
| 2261 | Leaf | Negative | cggggctcctttcaggttaa    | 21 | 61 |
| 2262 | Leaf | Negative | cggggctcctttcaggttaa    | 21 | 61 |
| 2263 | Leaf | Negative | cggggctcctttcaggttaa    | 21 | 61 |
| 2264 | Leaf | Negative | cggggctcctttcaggttaa    | 21 | 61 |
| 2265 | Leaf | Negative | cggggctcctttcaggttaa    | 21 | 61 |
| 2266 | Leaf | Negative | cggggctcctttcaggttaa    | 21 | 61 |
| 2267 | Leaf | Negative | cggggctcctttcaggttaa    | 21 | 61 |
| 2268 | Leaf | Negative | cggggctcctttcaggttaa    | 21 | 61 |
| 2269 | Leaf | Negative | ccggggctcctttcaggttaa   | 21 | 61 |
| 2270 | Leaf | Negative | ccggggctcctttcaggttaa   | 22 | 61 |
| 2271 | Leaf | Negative | ccggggctcctttcaggttaa   | 22 | 61 |
| 2272 | Leaf | Negative | ccggggctcctttcaggttaa   | 22 | 61 |
| 2273 | Leaf | Negative | ccggggctcctttcaggttaa   | 22 | 61 |
| 2274 | Leaf | Negative | ccccggggctcctttcaggttaa | 24 | 61 |
| 2275 | Leaf | Negative | gggctcctttcaggtta       | 18 | 62 |
| 2276 | Leaf | Negative | ccggggctcctttcaggtta    | 21 | 62 |
| 2277 | Leaf | Negative | ccggggctcctttcaggtta    | 21 | 62 |
| 2278 | Leaf | Negative | ccggggctcctttcaggtta    | 22 | 62 |
| 2279 | Leaf | Negative | cggggctcctttcaggtt      | 19 | 63 |
| 2280 | Leaf | Negative | ttgccccggggctcctttcaggt | 24 | 64 |
| 2281 | Leaf | Negative | tgccccggggctcctttcaggt  | 21 | 66 |
| 2282 | Leaf | Negative | ttgccccggggctcctttcaggt | 21 | 67 |
| 2283 | Leaf | Negative | agttgccccggggctcct      | 17 | 73 |
| 2284 | Leaf | Negative | agaagagttgccccggggctc   | 21 | 74 |
| 2285 | Leaf | Negative | agaagagttgccccggggctc   | 21 | 74 |
| 2286 | Leaf | Negative | agaagagttgccccggggctc   | 21 | 74 |







|      |      |          |                          |    |     |
|------|------|----------|--------------------------|----|-----|
| 2551 | Leaf | Negative | ccacgcctctcgctggattctg   | 22 | 95  |
| 2552 | Leaf | Negative | ccacgcctctcgctggattctg   | 22 | 95  |
| 2553 | Leaf | Negative | ccacgcctctcgctggattctg   | 22 | 95  |
| 2554 | Leaf | Negative | ccacgcctctcgctggattctg   | 22 | 95  |
| 2555 | Leaf | Negative | ccacgcctctcgctggattctg   | 22 | 95  |
| 2556 | Leaf | Negative | ccacgcctctcgctggattctg   | 22 | 95  |
| 2557 | Leaf | Negative | ccacgcctctcgctggattctg   | 22 | 95  |
| 2558 | Leaf | Negative | ccacgcctctcgctggattctg   | 22 | 95  |
| 2559 | Leaf | Negative | cgctctcgctggattct        | 18 | 96  |
| 2560 | Leaf | Negative | cacgcctctcgctggattct     | 20 | 96  |
| 2561 | Leaf | Negative | ccacgcctctcgctggattct    | 21 | 96  |
| 2562 | Leaf | Negative | ccacgcctctcgctggattct    | 21 | 96  |
| 2563 | Leaf | Negative | ccacgcctctcgctggattct    | 21 | 96  |
| 2564 | Leaf | Negative | ccacgcctctcgctggattc     | 20 | 97  |
| 2565 | Leaf | Negative | tcacgcctctcgctggattc     | 21 | 97  |
| 2566 | Leaf | Negative | cacgcctctcgctggatt       | 18 | 98  |
| 2567 | Leaf | Negative | ccacgcctctcgctggatt      | 19 | 98  |
| 2568 | Leaf | Negative | tcacgcctctcgctggatt      | 21 | 99  |
| 2569 | Leaf | Negative | ctctctccacgcctctcgctg    | 21 | 102 |
| 2570 | Leaf | Negative | cctctctccacgcctctcgct    | 21 | 103 |
| 2571 | Leaf | Negative | ccctctctccacgcctctcg     | 21 | 104 |
| 2572 | Leaf | Negative | gccctctctccacgcctctcg    | 22 | 104 |
| 2573 | Leaf | Negative | cgccctctctccacgcctctcg   | 24 | 104 |
| 2574 | Leaf | Negative | cgccctctctccacgcctctc    | 22 | 106 |
| 2575 | Leaf | Negative | cgccctctctccacgcctct     | 20 | 107 |
| 2576 | Leaf | Negative | cgccctctctccacgcctct     | 20 | 107 |
| 2577 | Leaf | Negative | cgccctctctccacgcctct     | 21 | 107 |
| 2578 | Leaf | Negative | accgcgccctctctccacgcctc  | 24 | 108 |
| 2579 | Leaf | Negative | ccgcgccctctctccacgc      | 21 | 110 |
| 2580 | Leaf | Negative | ccgcgccctctctccacgc      | 21 | 110 |
| 2581 | Leaf | Negative | ccgcgccctctctccacgc      | 21 | 110 |
| 2582 | Leaf | Negative | ccgcgccctctctccacgc      | 21 | 110 |
| 2583 | Leaf | Negative | caccgcgccctctctccacgc    | 22 | 111 |
| 2584 | Leaf | Negative | agagcaccgcgccctctctccac  | 24 | 113 |
| 2585 | Leaf | Negative | cagagcaccgcgccctctct     | 21 | 117 |
| 2586 | Leaf | Negative | cagagcaccgcgccctctct     | 21 | 117 |
| 2587 | Leaf | Negative | ccagagcaccgcgccctctct    | 22 | 117 |
| 2588 | Leaf | Negative | tactccagagcaccgcgcc      | 21 | 122 |
| 2589 | Leaf | Negative | tactccagagcaccgcgcc      | 21 | 122 |
| 2590 | Leaf | Negative | ctactccagagcaccgcgcc     | 22 | 122 |
| 2591 | Leaf | Negative | ctactccagagcaccgcgcc     | 21 | 123 |
| 2592 | Leaf | Negative | ctactccagagcaccgcgcc     | 21 | 123 |
| 2593 | Leaf | Negative | tctactccagagcaccgcgcc    | 20 | 124 |
| 2594 | Leaf | Negative | tctactccagagcaccgcgcc    | 21 | 124 |
| 2595 | Leaf | Negative | tctactccagagcaccgcgcc    | 21 | 124 |
| 2596 | Leaf | Negative | tctactccagagcaccgcgcc    | 21 | 124 |
| 2597 | Leaf | Negative | cttactccagagcaccgcgcc    | 22 | 124 |
| 2598 | Leaf | Negative | tctactccagagcaccgcgcc    | 20 | 125 |
| 2599 | Leaf | Negative | tctactccagagcaccgcgcc    | 20 | 125 |
| 2600 | Leaf | Negative | cttactccagagcaccgcgcc    | 21 | 125 |
| 2601 | Leaf | Negative | cttactccagagcaccgcgcc    | 21 | 125 |
| 2602 | Leaf | Negative | cttactccagagcaccgcgcc    | 21 | 125 |
| 2603 | Leaf | Negative | cttactccagagcaccgcgcc    | 21 | 125 |
| 2604 | Leaf | Negative | cttactccagagcaccgcgcc    | 21 | 125 |
| 2605 | Leaf | Negative | cttactccagagcaccgcgcc    | 21 | 125 |
| 2606 | Leaf | Negative | ccttactccagagcaccgcgcc   | 22 | 125 |
| 2607 | Leaf | Negative | agagcctctactccagagcaccg  | 24 | 127 |
| 2608 | Leaf | Negative | cagagcctctactccagagcac   | 22 | 130 |
| 2609 | Leaf | Negative | cagagcctctactccagagcac   | 22 | 130 |
| 2610 | Leaf | Negative | cagagcctctactccagagca    | 21 | 131 |
| 2611 | Leaf | Negative | cagagcctctactccagagca    | 21 | 131 |
| 2612 | Leaf | Negative | aaggcagagcctctactccagagc | 24 | 132 |
| 2613 | Leaf | Negative | cgaaggcagagcctctactccaga | 24 | 134 |
| 2614 | Leaf | Negative | cgaaggcagagcctctactccaga | 24 | 134 |
| 2615 | Leaf | Negative | cgaaggcagagcctctactccaga | 24 | 134 |
| 2616 | Leaf | Negative | cgaaggcagagcctctactccaga | 24 | 134 |
| 2617 | Leaf | Negative | cgaaggcagagcctctactccaga | 24 | 134 |
| 2618 | Leaf | Negative | cgaaggcagagcctctactccaga | 24 | 134 |
| 2619 | Leaf | Negative | cgaaggcagagcctctactccaga | 24 | 134 |
| 2620 | Leaf | Negative | cgaaggcagagcctctactccaga | 24 | 134 |
| 2621 | Leaf | Negative | cgaaggcagagcctctactccaga | 24 | 134 |
| 2622 | Leaf | Negative | cgaaggcagagcctctactccaga | 24 | 134 |
| 2623 | Leaf | Negative | cgaaggcagagcctctactccaga | 24 | 134 |
| 2624 | Leaf | Negative | cgaaggcagagcctctactccaga | 24 | 134 |
| 2625 | Leaf | Negative | cgaaggcagagcctctactccaga | 24 | 134 |
| 2626 | Leaf | Negative | cgaaggcagagcctctactccaga | 24 | 134 |
| 2627 | Leaf | Negative | cgaaggcagagcctctactccaga | 24 | 134 |
| 2628 | Leaf | Negative | cgaaggcagagcctctactccaga | 24 | 134 |
| 2629 | Leaf | Negative | cgaaggcagagcctctactccaga | 24 | 134 |
| 2630 | Leaf | Negative | aggcagagcctctactccag     | 20 | 135 |
| 2631 | Leaf | Negative | aggcagagcctctactccag     | 20 | 135 |
| 2632 | Leaf | Negative | aaggcagagcctctactccag    | 21 | 135 |
| 2633 | Leaf | Negative | aaggcagagcctctactccag    | 21 | 135 |
| 2634 | Leaf | Negative | gaaggcagagcctctactccag   | 22 | 135 |
| 2635 | Leaf | Negative | cgaaggcagagcctctactccag  | 23 | 135 |
| 2636 | Leaf | Negative | gaaggcagagcctctactcca    | 21 | 136 |
| 2637 | Leaf | Negative | cgaaggcagagcctctactcca   | 22 | 136 |
| 2638 | Leaf | Negative | cgaaggcagagcctctactcca   | 22 | 136 |







































|      |        |          |                          |    |     |
|------|--------|----------|--------------------------|----|-----|
| 4311 | Leaf   | Negative | caagagaggatccgcgga       | 21 | 269 |
| 4312 | Leaf   | Negative | ctcaagagaggatccgcgga     | 21 | 271 |
| 4313 | Leaf   | Negative | ctcaagagaggatccgcgga     | 21 | 271 |
| 4314 | Leaf   | Negative | gctcaagagaggatccgcgga    | 22 | 271 |
| 4315 | Leaf   | Negative | gctcaagagaggatccgcgga    | 22 | 271 |
| 4316 | Leaf   | Negative | gaggggctcaagagaggatccgc  | 23 | 275 |
| 4317 | Leaf   | Negative | cagaggggctcaagagaggatccg | 24 | 276 |
| 4318 | Leaf   | Negative | cagaggggctcaagagaggatc   | 22 | 278 |
| 4319 | Leaf   | Negative | cagaggggctcaagagaggatc   | 22 | 278 |
| 4320 | Leaf   | Negative | ggggctcaagagaggat        | 17 | 279 |
| 4321 | Leaf   | Negative | cagaggggctcaagagaggat    | 21 | 279 |
| 4322 | Leaf   | Negative | ccagaggggctcaagagagga    | 21 | 280 |
| 4323 | Leaf   | Negative | ccagaggggctcaagagagga    | 21 | 280 |
| 4324 | Leaf   | Negative | ccagaggggctcaagagagga    | 21 | 280 |
| 4325 | Leaf   | Negative | ccagaggggctcaagagagga    | 21 | 280 |
| 4326 | Leaf   | Negative | ccagaggggctcaagagagga    | 21 | 280 |
| 4327 | Leaf   | Negative | ccagaggggctcaagagagga    | 21 | 280 |
| 4328 | Leaf   | Negative | ccagaggggctcaagagagga    | 21 | 280 |
| 4329 | Leaf   | Negative | ccagaggggctcaagagagga    | 21 | 280 |
| 4330 | Leaf   | Negative | cccagaggggctcaagagagga   | 22 | 280 |
| 4331 | Leaf   | Negative | cccagaggggctcaagagagga   | 22 | 280 |
| 4332 | Leaf   | Negative | cccagaggggctcaagagagga   | 22 | 280 |
| 4333 | Leaf   | Negative | tcccagaggggctcaagagagga  | 24 | 280 |
| 4334 | Leaf   | Negative | cagaggggctcaagagagg      | 19 | 281 |
| 4335 | Leaf   | Negative | cagaggggctcaagagagg      | 19 | 281 |
| 4336 | Leaf   | Negative | ccccagaggggctcaagagagg   | 22 | 281 |
| 4337 | Leaf   | Negative | cagaggggctcaagagagg      | 18 | 282 |
| 4338 | Leaf   | Negative | attccccagaggggctcaagag   | 22 | 284 |
| 4339 | Leaf   | Negative | attccccagaggggctcaagag   | 22 | 284 |
| 4340 | Leaf   | Negative | tcgagaattccccagaggggctca | 24 | 288 |
| 4341 | Leaf   | Negative | attccccagaggggctc        | 17 | 289 |
| 4342 | Leaf   | Negative | actcgagaattccccagaggggct | 24 | 290 |
| 4343 | Leaf   | Negative | tcgagaattccccagaggggct   | 21 | 291 |
| 4344 | Leaf   | Negative | tcgagaattccccagaggggct   | 21 | 291 |
| 4345 | Phloem | Positive | ctggggaattctcgagttgccg   | 22 | 1   |
| 4346 | Phloem | Positive | ctggggaattctcgagttgccg   | 22 | 1   |
| 4347 | Phloem | Positive | ctggggaattctcgagttgccg   | 22 | 1   |
| 4348 | Phloem | Positive | ctggggaattctcgagttgccg   | 22 | 1   |
| 4349 | Phloem | Positive | tggggaattctcgagttgccg    | 22 | 2   |
| 4350 | Phloem | Positive | ggaattctcgagttgccgcaa    | 21 | 5   |
| 4351 | Phloem | Positive | ggaattctcgagttgccgcaa    | 21 | 5   |
| 4352 | Phloem | Positive | gaattctcgagttgccgcaaa    | 21 | 6   |
| 4353 | Phloem | Positive | aattctcgagttgccgcaaaag   | 22 | 7   |
| 4354 | Phloem | Positive | ctaggcaggagggtgcttacc    | 21 | 45  |
| 4355 | Phloem | Positive | taggcaggagggtgcttaccctg  | 22 | 46  |
| 4356 | Phloem | Positive | aggcaggagggtgcttaccct    | 20 | 47  |
| 4357 | Phloem | Positive | aggcaggagggtgcttaccct    | 20 | 47  |
| 4358 | Phloem | Positive | caggagggtgcttaccctga     | 19 | 50  |
| 4359 | Phloem | Positive | caggagggtgcttaccctgagaa  | 22 | 50  |
| 4360 | Phloem | Positive | caggagggtgcttaccctgagaa  | 22 | 50  |
| 4361 | Phloem | Positive | caggagggtgcttaccctgagaaa | 23 | 50  |
| 4362 | Phloem | Positive | caggagggtgcttaccctgagaaa | 24 | 50  |
| 4363 | Phloem | Positive | caggagggtgcttaccctgagaaa | 24 | 50  |
| 4364 | Phloem | Positive | gggagggtgcttaccctgagaaa  | 21 | 52  |
| 4365 | Phloem | Positive | tgcttaccctgagaaaaggagccc | 22 | 58  |
| 4366 | Phloem | Positive | tgcttaccctgagaaaaggagccc | 22 | 58  |
| 4367 | Phloem | Positive | cttaccctgagaaaaggagccccg | 22 | 60  |
| 4368 | Phloem | Positive | cttaccctgagaaaaggagccccg | 22 | 60  |
| 4369 | Phloem | Positive | cttaccctgagaaaaggagccccg | 22 | 60  |
| 4370 | Phloem | Positive | cttaccctgagaaaaggagccccg | 22 | 60  |
| 4371 | Phloem | Positive | cttaccctgagaaaaggagccccg | 22 | 60  |
| 4372 | Phloem | Positive | taccctgagaaaaggagccccgg  | 22 | 61  |
| 4373 | Phloem | Positive | taccctgagaaaaggagccccgg  | 21 | 62  |
| 4374 | Phloem | Positive | cctgagaaaaggagccccggggc  | 22 | 64  |
| 4375 | Phloem | Positive | cctgagaaaaggagccccggggc  | 22 | 64  |
| 4376 | Phloem | Positive | ctgagaaaaggagccccggggc   | 21 | 65  |
| 4377 | Phloem | Positive | ctgagaaaaggagccccggggc   | 21 | 65  |
| 4378 | Phloem | Positive | ctgagaaaaggagccccggggc   | 21 | 65  |
| 4379 | Phloem | Positive | ctgagaaaaggagccccggggc   | 22 | 65  |
| 4380 | Phloem | Positive | ctgagaaaaggagccccggggc   | 22 | 65  |
| 4381 | Phloem | Positive | ctgagaaaaggagccccggggc   | 22 | 65  |
| 4382 | Phloem | Positive | ctgagaaaaggagccccggggc   | 22 | 65  |
| 4383 | Phloem | Positive | tgagaaaaggagccccggggc    | 20 | 66  |
| 4384 | Phloem | Positive | tgagaaaaggagccccggggc    | 21 | 66  |
| 4385 | Phloem | Positive | tgagaaaaggagccccggggc    | 22 | 66  |
| 4386 | Phloem | Positive | tgagaaaaggagccccggggc    | 22 | 66  |
| 4387 | Phloem | Positive | tgagaaaaggagccccggggc    | 22 | 66  |
| 4388 | Phloem | Positive | gagaaaaggagccccggggc     | 21 | 67  |
| 4389 | Phloem | Positive | gagaaaaggagccccggggc     | 21 | 67  |
| 4390 | Phloem | Positive | gaaaaggagccccggggc       | 21 | 69  |
| 4391 | Phloem | Positive | aaggagccccggggc          | 21 | 71  |
| 4392 | Phloem | Positive | gagccccggggc             | 22 | 74  |
| 4393 | Phloem | Positive | gccccggggc               | 23 | 76  |
| 4394 | Phloem | Positive | ccccggggc                | 22 | 77  |
| 4395 | Phloem | Positive | ccccggggc                | 22 | 77  |
| 4396 | Phloem | Positive | ccccggggc                | 22 | 77  |
| 4397 | Phloem | Positive | ccccggggc                | 21 | 78  |
| 4398 | Phloem | Positive | cggggcaactctctcagaatc    | 22 | 80  |



|      |        |          |                       |    |     |
|------|--------|----------|-----------------------|----|-----|
| 4487 | Phloem | Positive | gagagcgtggagagagggccg | 22 | 106 |
| 4488 | Phloem | Positive | gagagcgtggagagagggccg | 22 | 106 |
| 4489 | Phloem | Positive | gagagcgtggagagagggccg | 22 | 106 |
| 4490 | Phloem | Positive | gagagcgtggagagagggccg | 22 | 106 |
| 4491 | Phloem | Positive | gagagcgtggagagagggccg | 23 | 106 |
| 4492 | Phloem | Positive | agagcgtggagagagggccg  | 21 | 107 |
| 4493 | Phloem | Positive | agagcgtggagagagggccg  | 21 | 107 |
| 4494 | Phloem | Positive | agagcgtggagagagggccg  | 22 | 107 |
| 4495 | Phloem | Positive | gagcgtggagagagggccg   | 21 | 108 |
| 4496 | Phloem | Positive | gagcgtggagagagggccg   | 21 | 108 |
| 4497 | Phloem | Positive | gcgtggagagagggccg     | 17 | 111 |
| 4498 | Phloem | Positive | cggtggagagagggccg     | 22 | 112 |
| 4499 | Phloem | Positive | tgagagagagggccg       | 19 | 114 |
| 4500 | Phloem | Positive | tgagagagagggccg       | 21 | 114 |
| 4501 | Phloem | Positive | tgagagagagggccg       | 21 | 114 |
| 4502 | Phloem | Positive | tgagagagagggccg       | 22 | 114 |
| 4503 | Phloem | Positive | tgagagagagggccg       | 22 | 114 |
| 4504 | Phloem | Positive | tgagagagagggccg       | 22 | 114 |
| 4505 | Phloem | Positive | tgagagagagggccg       | 22 | 114 |
| 4506 | Phloem | Positive | tgagagagagggccg       | 22 | 114 |
| 4507 | Phloem | Positive | ggagagagggccg         | 20 | 115 |
| 4508 | Phloem | Positive | ggagagagggccg         | 21 | 115 |
| 4509 | Phloem | Positive | agagagggccg           | 20 | 117 |
| 4510 | Phloem | Positive | ccgctgtctctggagtaga   | 20 | 125 |
| 4511 | Phloem | Positive | ccgctgtctctggagtaga   | 20 | 125 |
| 4512 | Phloem | Positive | ccgctgtctctggagtaga   | 21 | 125 |
| 4513 | Phloem | Positive | ccgctgtctctggagtaga   | 21 | 125 |
| 4514 | Phloem | Positive | ccgctgtctctggagtaga   | 22 | 125 |
| 4515 | Phloem | Positive | ccgctgtctctggagtaga   | 22 | 125 |
| 4516 | Phloem | Positive | ccgctgtctctggagtaga   | 23 | 125 |
| 4517 | Phloem | Positive | ccgctgtctctggagtaga   | 24 | 125 |
| 4518 | Phloem | Positive | cgctgtctctggagtaga    | 20 | 126 |
| 4519 | Phloem | Positive | cgctgtctctggagtaga    | 22 | 126 |
| 4520 | Phloem | Positive | cgctgtctctggagtaga    | 22 | 126 |
| 4521 | Phloem | Positive | cgctgtctctggagtaga    | 24 | 126 |
| 4522 | Phloem | Positive | tgctctgagtagagctctg   | 21 | 131 |
| 4523 | Phloem | Positive | ctctgagtagagctctg     | 20 | 133 |
| 4524 | Phloem | Positive | ctctgagtagagctctg     | 21 | 133 |
| 4525 | Phloem | Positive | ctctgagtagagctctg     | 22 | 133 |
| 4526 | Phloem | Positive | tctggagtagagctctg     | 21 | 134 |
| 4527 | Phloem | Positive | tctggagtagagctctg     | 22 | 134 |
| 4528 | Phloem | Positive | tctggagtagagctctg     | 22 | 134 |
| 4529 | Phloem | Positive | ctggagtagagctctg      | 22 | 135 |
| 4530 | Phloem | Positive | ctggagtagagctctg      | 22 | 135 |
| 4531 | Phloem | Positive | ctggagtagagctctg      | 22 | 135 |
| 4532 | Phloem | Positive | ctggagtagagctctg      | 22 | 135 |
| 4533 | Phloem | Positive | ctggagtagagctctg      | 24 | 135 |
| 4534 | Phloem | Positive | ggagtagagctctg        | 22 | 137 |
| 4535 | Phloem | Positive | gctctgctcgaacaccatc   | 22 | 146 |
| 4536 | Phloem | Positive | gctctgctcgaacaccatc   | 24 | 146 |
| 4537 | Phloem | Positive | ctctgctcgaacaccatc    | 22 | 147 |
| 4538 | Phloem | Positive | ctctgctcgaacaccatc    | 22 | 147 |
| 4539 | Phloem | Positive | tctgctcgaacaccatc     | 21 | 148 |
| 4540 | Phloem | Positive | tctgctcgaacaccatc     | 21 | 148 |
| 4541 | Phloem | Positive | tctgctcgaacaccatc     | 22 | 148 |
| 4542 | Phloem | Positive | tctgctcgaacaccatc     | 22 | 148 |
| 4543 | Phloem | Positive | tctgctcgaacaccatc     | 22 | 148 |
| 4544 | Phloem | Positive | tctgctcgaacaccatc     | 23 | 148 |
| 4545 | Phloem | Positive | tctgctcgaacaccatc     | 23 | 148 |
| 4546 | Phloem | Positive | ctgctcgaacaccatc      | 21 | 149 |
| 4547 | Phloem | Positive | ctgctcgaacaccatc      | 21 | 149 |
| 4548 | Phloem | Positive | ctgctcgaacaccatc      | 21 | 149 |
| 4549 | Phloem | Positive | ctgctcgaacaccatc      | 22 | 149 |
| 4550 | Phloem | Positive | ctgctcgaacaccatc      | 22 | 149 |
| 4551 | Phloem | Positive | ctgctcgaacaccatc      | 22 | 149 |
| 4552 | Phloem | Positive | ctgctcgaacaccatc      | 23 | 149 |
| 4553 | Phloem | Positive | ctcgaacaccatc         | 22 | 153 |
| 4554 | Phloem | Positive | ctcgaacaccatc         | 24 | 153 |
| 4555 | Phloem | Positive | tcgaacaccatc          | 22 | 155 |
| 4556 | Phloem | Positive | cgaaacaccatc          | 21 | 156 |
| 4557 | Phloem | Positive | cgaaacaccatc          | 21 | 156 |
| 4558 | Phloem | Positive | gaaacaccatc           | 21 | 157 |
| 4559 | Phloem | Positive | aaacaccatc            | 17 | 158 |
| 4560 | Phloem | Positive | aaacaccatc            | 21 | 158 |
| 4561 | Phloem | Positive | aaacaccatc            | 21 | 158 |
| 4562 | Phloem | Positive | aaacaccatc            | 22 | 158 |
| 4563 | Phloem | Positive | acaccatc              | 22 | 160 |
| 4564 | Phloem | Positive | acaccatc              | 22 | 160 |
| 4565 | Phloem | Positive | caccatc               | 22 | 161 |
| 4566 | Phloem | Positive | caccatc               | 22 | 161 |
| 4567 | Phloem | Positive | accatc                | 20 | 162 |
| 4568 | Phloem | Positive | ccatc                 | 22 | 163 |
| 4569 | Phloem | Positive | ccatc                 | 23 | 163 |
| 4570 | Phloem | Positive | ccatc                 | 23 | 163 |
| 4571 | Phloem | Positive | catc                  | 19 | 164 |
| 4572 | Phloem | Positive | catc                  | 22 | 164 |
| 4573 | Phloem | Positive | catc                  | 23 | 164 |
| 4574 | Phloem | Positive | atc                   | 22 | 165 |

|      |        |          |                             |    |     |
|------|--------|----------|-----------------------------|----|-----|
| 4575 | Phloem | Positive | atcgatgccccctctcttta        | 22 | 165 |
| 4576 | Phloem | Positive | tcgatgccccctctcttta         | 21 | 166 |
| 4577 | Phloem | Positive | cgatgccccctctcttta          | 20 | 167 |
| 4578 | Phloem | Positive | cgatgccccctctctttacc        | 21 | 167 |
| 4579 | Phloem | Positive | cgatgccccctctctttacc        | 22 | 167 |
| 4580 | Phloem | Positive | cgatgccccctctctttacc        | 22 | 167 |
| 4581 | Phloem | Positive | cgatgccccctctctttacc        | 22 | 167 |
| 4582 | Phloem | Positive | cgatgccccctctctttacc        | 22 | 167 |
| 4583 | Phloem | Positive | cgatgccccctctctttacc        | 22 | 167 |
| 4584 | Phloem | Positive | gatgccccctctctttacc         | 22 | 168 |
| 4585 | Phloem | Positive | cgccccctctctttaccct         | 21 | 171 |
| 4586 | Phloem | Positive | cgccccctctctttaccct         | 22 | 171 |
| 4587 | Phloem | Positive | gtccccctctctttaccct         | 21 | 172 |
| 4588 | Phloem | Positive | cctctctttaccctctct          | 21 | 175 |
| 4589 | Phloem | Positive | cctctctttaccctctct          | 21 | 175 |
| 4590 | Phloem | Positive | ctctctttaccctctctgg         | 22 | 176 |
| 4591 | Phloem | Positive | ctctctttaccctctctggc        | 23 | 176 |
| 4592 | Phloem | Positive | ttctctttaccctctctggctc      | 24 | 177 |
| 4593 | Phloem | Positive | ttctctttaccctctctggctc      | 24 | 178 |
| 4594 | Phloem | Positive | cttaccctctctggct            | 18 | 182 |
| 4595 | Phloem | Positive | cttaccctctctggctctc         | 22 | 182 |
| 4596 | Phloem | Positive | ttaccctctctggctctctgg       | 24 | 184 |
| 4597 | Phloem | Positive | taccctctctggctctct          | 20 | 185 |
| 4598 | Phloem | Positive | taccctctctggctctct          | 20 | 185 |
| 4599 | Phloem | Positive | taccctctctggctctctg         | 22 | 185 |
| 4600 | Phloem | Positive | cctctctggctctctgg           | 21 | 187 |
| 4601 | Phloem | Positive | cctctctggctctctgg           | 21 | 187 |
| 4602 | Phloem | Positive | cctctctggctctctgg           | 21 | 187 |
| 4603 | Phloem | Positive | cctctctggctctctgg           | 21 | 187 |
| 4604 | Phloem | Positive | cctctctggctctctgg           | 21 | 187 |
| 4605 | Phloem | Positive | cctctctggctctctggaga        | 24 | 187 |
| 4606 | Phloem | Positive | cctctctggctctctggaga        | 24 | 187 |
| 4607 | Phloem | Positive | ctctctggctctctgg            | 20 | 188 |
| 4608 | Phloem | Positive | ctctctggctctctgg            | 20 | 188 |
| 4609 | Phloem | Positive | ctctctggctctctggga          | 21 | 188 |
| 4610 | Phloem | Positive | ctctctggctctctggga          | 21 | 188 |
| 4611 | Phloem | Positive | ctctctggctctctggga          | 21 | 188 |
| 4612 | Phloem | Positive | ctctctggctctctgggag         | 22 | 188 |
| 4613 | Phloem | Positive | ctctctggctctctgggag         | 22 | 188 |
| 4614 | Phloem | Positive | ttctctggctctctgggag         | 21 | 189 |
| 4615 | Phloem | Positive | ttctctggctctctgggaga        | 22 | 189 |
| 4616 | Phloem | Positive | ttctctggctctctgggagacgc     | 24 | 190 |
| 4617 | Phloem | Positive | ttctctggctctctgggagacgc     | 24 | 190 |
| 4618 | Phloem | Positive | ctctctggctctctgggagacgc     | 22 | 191 |
| 4619 | Phloem | Positive | ctctctggctctctgggagacgc     | 22 | 191 |
| 4620 | Phloem | Positive | ttctctggctctctgggagacgc     | 22 | 192 |
| 4621 | Phloem | Positive | ctctctggctctctgggagacgcga   | 22 | 194 |
| 4622 | Phloem | Positive | ctctctggctctctgggagacgcgacc | 24 | 194 |
| 4623 | Phloem | Positive | ttctctggctctctgggagacgcgacc | 23 | 195 |
| 4624 | Phloem | Positive | gctctctgggagacgcgacc        | 21 | 197 |
| 4625 | Phloem | Positive | ctctctgggagacgcgacc         | 19 | 198 |
| 4626 | Phloem | Positive | ctctctgggagacgcgacc         | 20 | 198 |
| 4627 | Phloem | Positive | ctctctgggagacgcgaccg        | 21 | 198 |
| 4628 | Phloem | Positive | ctctctgggagacgcgaccgg       | 22 | 198 |
| 4629 | Phloem | Positive | ctctctgggagacgcgaccgg       | 22 | 198 |
| 4630 | Phloem | Positive | ctctctgggagacgcgaccgg       | 22 | 198 |
| 4631 | Phloem | Positive | ctctctgggagacgcgaccgg       | 22 | 198 |
| 4632 | Phloem | Positive | ctctctgggagacgcgaccgg       | 22 | 198 |
| 4633 | Phloem | Positive | ctctctgggagacgcgaccgg       | 22 | 198 |
| 4634 | Phloem | Positive | ctctctgggagacgcgaccgg       | 22 | 198 |
| 4635 | Phloem | Positive | ctctctgggagacgcgaccgg       | 22 | 198 |
| 4636 | Phloem | Positive | ctctctgggagacgcgaccgg       | 22 | 198 |
| 4637 | Phloem | Positive | ctctctgggagacgcgaccgg       | 22 | 198 |
| 4638 | Phloem | Positive | ctctctgggagacgcgaccgg       | 22 | 198 |
| 4639 | Phloem | Positive | ctctctgggagacgcgaccgg       | 22 | 198 |
| 4640 | Phloem | Positive | ctctctgggagacgcgaccgg       | 22 | 198 |
| 4641 | Phloem | Positive | ctctctgggagacgcgaccgg       | 22 | 198 |
| 4642 | Phloem | Positive | ctctctgggagacgcgaccggt      | 23 | 198 |
| 4643 | Phloem | Positive | ctctctgggagacgcgaccggt      | 23 | 198 |
| 4644 | Phloem | Positive | ctctctgggagacgcgaccggtg     | 24 | 198 |
| 4645 | Phloem | Positive | ctctctgggagacgcgaccggtg     | 24 | 198 |
| 4646 | Phloem | Positive | ctctctgggagacgcgaccggtg     | 24 | 198 |
| 4647 | Phloem | Positive | ctctctgggagacgcgaccggtgg    | 25 | 198 |
| 4648 | Phloem | Positive | ttctctgggagacgcgaccgg       | 21 | 199 |
| 4649 | Phloem | Positive | ttctctgggagacgcgaccggt      | 22 | 199 |
| 4650 | Phloem | Positive | ttctctgggagacgcgaccggt      | 22 | 199 |
| 4651 | Phloem | Positive | ttctctgggagacgcgaccggt      | 22 | 199 |
| 4652 | Phloem | Positive | ttctctgggagacgcgaccggtg     | 23 | 199 |
| 4653 | Phloem | Positive | ctctctgggagacgcgaccggt      | 21 | 200 |
| 4654 | Phloem | Positive | ctctctgggagacgcgaccggt      | 21 | 200 |
| 4655 | Phloem | Positive | ctctctgggagacgcgaccggt      | 21 | 200 |
| 4656 | Phloem | Positive | ctctctgggagacgcgaccggt      | 21 | 200 |
| 4657 | Phloem | Positive | ctctctgggagacgcgaccggt      | 21 | 200 |
| 4658 | Phloem | Positive | ctctctgggagacgcgaccggt      | 21 | 200 |
| 4659 | Phloem | Positive | ctctctgggagacgcgaccggt      | 21 | 200 |
| 4660 | Phloem | Positive | ctctctgggagacgcgaccggtg     | 22 | 200 |
| 4661 | Phloem | Positive | ctctctgggagacgcgaccggtg     | 22 | 200 |
| 4662 | Phloem | Positive | ctctctgggagacgcgaccggtg     | 22 | 200 |





|      |        |          |                           |    |     |
|------|--------|----------|---------------------------|----|-----|
| 4839 | Phloem | Positive | tgagacgcgaccggtggcacc     | 24 | 205 |
| 4840 | Phloem | Positive | ggagacgcgaccggtggcacc     | 21 | 206 |
| 4841 | Phloem | Positive | ggagacgcgaccggtggcacc     | 21 | 206 |
| 4842 | Phloem | Positive | ggagacgcgaccggtggcacc     | 21 | 206 |
| 4843 | Phloem | Positive | ggagacgcgaccggtggcacc     | 21 | 206 |
| 4844 | Phloem | Positive | ggagacgcgaccggtggcacc     | 21 | 206 |
| 4845 | Phloem | Positive | ggagacgcgaccggtggcacc     | 21 | 206 |
| 4846 | Phloem | Positive | ggagacgcgaccggtggcacc     | 21 | 206 |
| 4847 | Phloem | Positive | ggagacgcgaccggtggcacc     | 21 | 206 |
| 4848 | Phloem | Positive | ggagacgcgaccggtggcacc     | 21 | 206 |
| 4849 | Phloem | Positive | ggagacgcgaccggtggcacc     | 21 | 206 |
| 4850 | Phloem | Positive | ggagacgcgaccggtggcacc     | 21 | 206 |
| 4851 | Phloem | Positive | ggagacgcgaccggtggcacc     | 21 | 206 |
| 4852 | Phloem | Positive | ggagacgcgaccggtggcacc     | 21 | 206 |
| 4853 | Phloem | Positive | ggagacgcgaccggtggcacc     | 21 | 206 |
| 4854 | Phloem | Positive | ggagacgcgaccggtggcacc     | 21 | 206 |
| 4855 | Phloem | Positive | ggagacgcgaccggtggcacc     | 22 | 206 |
| 4856 | Phloem | Positive | ggagacgcgaccggtggcacc     | 22 | 206 |
| 4857 | Phloem | Positive | ggagacgcgaccggtggcacc     | 22 | 206 |
| 4858 | Phloem | Positive | ggagacgcgaccggtggcacc     | 22 | 206 |
| 4859 | Phloem | Positive | ggagacgcgaccggtggcacc     | 22 | 206 |
| 4860 | Phloem | Positive | ggagacgcgaccggtggcacc     | 22 | 206 |
| 4861 | Phloem | Positive | gagacgcgaccggtggcacc      | 20 | 207 |
| 4862 | Phloem | Positive | gagacgcgaccggtggcacc      | 21 | 207 |
| 4863 | Phloem | Positive | gagacgcgaccggtggcacc      | 21 | 207 |
| 4864 | Phloem | Positive | gagacgcgaccggtggcacc      | 21 | 207 |
| 4865 | Phloem | Positive | gagacgcgaccggtggcacc      | 21 | 207 |
| 4866 | Phloem | Positive | gagacgcgaccggtggcacc      | 21 | 207 |
| 4867 | Phloem | Positive | gagacgcgaccggtggcacc      | 21 | 207 |
| 4868 | Phloem | Positive | gagacgcgaccggtggcacc      | 21 | 207 |
| 4869 | Phloem | Positive | gagacgcgaccggtggcacc      | 21 | 207 |
| 4870 | Phloem | Positive | gagacgcgaccggtggcacc      | 21 | 207 |
| 4871 | Phloem | Positive | gagacgcgaccggtggcacc      | 21 | 207 |
| 4872 | Phloem | Positive | gagacgcgaccggtggcacc      | 21 | 207 |
| 4873 | Phloem | Positive | gagacgcgaccggtggcacc      | 22 | 207 |
| 4874 | Phloem | Positive | gagacgcgaccggtggcacc      | 22 | 207 |
| 4875 | Phloem | Positive | gagacgcgaccggtggcacc      | 22 | 207 |
| 4876 | Phloem | Positive | gagacgcgaccggtggcacc      | 22 | 207 |
| 4877 | Phloem | Positive | gagacgcgaccggtggcacc      | 22 | 207 |
| 4878 | Phloem | Positive | gagacgcgaccggtggcacc      | 22 | 207 |
| 4879 | Phloem | Positive | gagacgcgaccggtggcacc      | 22 | 207 |
| 4880 | Phloem | Positive | gagacgcgaccggtggcacc      | 22 | 207 |
| 4881 | Phloem | Positive | gagacgcgaccggtggcaccct    | 23 | 207 |
| 4882 | Phloem | Positive | agacgcgaccggtggcacc       | 18 | 208 |
| 4883 | Phloem | Positive | agacgcgaccggtggcacc       | 20 | 208 |
| 4884 | Phloem | Positive | agacgcgaccggtggcacc       | 21 | 208 |
| 4885 | Phloem | Positive | agacgcgaccggtggcacc       | 21 | 208 |
| 4886 | Phloem | Positive | agacgcgaccggtggcacc       | 21 | 208 |
| 4887 | Phloem | Positive | agacgcgaccggtggcacc       | 21 | 208 |
| 4888 | Phloem | Positive | agacgcgaccggtggcacc       | 21 | 208 |
| 4889 | Phloem | Positive | agacgcgaccggtggcaccctgc   | 24 | 208 |
| 4890 | Phloem | Positive | gacgcgaccggtggcaccct      | 21 | 209 |
| 4891 | Phloem | Positive | cgacgcgaccggtggcacc       | 17 | 211 |
| 4892 | Phloem | Positive | gacgcgaccggtggcaccctg     | 19 | 212 |
| 4893 | Phloem | Positive | gacgcgaccggtggcaccctgctc  | 22 | 212 |
| 4894 | Phloem | Positive | gacgcgaccggtggcaccctgctc  | 22 | 212 |
| 4895 | Phloem | Positive | cgacgcgaccggtggcaccctg    | 18 | 213 |
| 4896 | Phloem | Positive | cgacgcgaccggtggcaccctgctc | 21 | 216 |
| 4897 | Phloem | Positive | cgacgcgaccggtggcaccctgctc | 21 | 216 |
| 4898 | Phloem | Positive | cgacgcgaccggtggcaccctgctc | 22 | 217 |
| 4899 | Phloem | Positive | cgacgcgaccggtggcaccctgctc | 22 | 217 |
| 4900 | Phloem | Positive | cgacgcgaccggtggcaccctgctc | 22 | 217 |
| 4901 | Phloem | Positive | gtggcaccctgctcgggttcgc    | 22 | 219 |
| 4902 | Phloem | Positive | gtggcaccctgctcgggttcgc    | 22 | 219 |
| 4903 | Phloem | Positive | gtggcaccctgctcgggttcgc    | 22 | 219 |
| 4904 | Phloem | Positive | gtggcaccctgctcgggttcgc    | 21 | 220 |
| 4905 | Phloem | Positive | gtggcaccctgctcgggttcgc    | 21 | 220 |
| 4906 | Phloem | Positive | gtggcaccctgctcgggttcgc    | 23 | 220 |
| 4907 | Phloem | Positive | ctgctcgggttcgctccaacc     | 20 | 228 |
| 4908 | Phloem | Positive | ctgctcgggttcgctccaacc     | 22 | 228 |
| 4909 | Phloem | Positive | tgctcgggttcgctccaac       | 17 | 229 |
| 4910 | Phloem | Positive | tgctcgggttcgctccaac       | 18 | 229 |
| 4911 | Phloem | Positive | tgctcgggttcgctccaacctgc   | 22 | 229 |
| 4912 | Phloem | Positive | ctcgggttcgctccaacctgct    | 21 | 231 |
| 4913 | Phloem | Positive | cgctccaacctgctttgttc      | 21 | 238 |
| 4914 | Phloem | Positive | cgctccaacctgctttgttc      | 21 | 238 |
| 4915 | Phloem | Positive | gctccaacctgctttgttcta     | 22 | 239 |
| 4916 | Phloem | Positive | ctccaacctgctttgttcta      | 21 | 240 |
| 4917 | Phloem | Positive | ctccaacctgctttgttctatc    | 23 | 240 |
| 4918 | Phloem | Positive | ctccaacctgctttgttctatc    | 23 | 240 |
| 4919 | Phloem | Positive | ctccaacctgctttgttctatc    | 23 | 240 |
| 4920 | Phloem | Positive | tccaacctgctttgttctatc     | 22 | 241 |
| 4921 | Phloem | Positive | tccaacctgctttgttctatc     | 22 | 241 |
| 4922 | Phloem | Positive | ccaacctgctttgttctatc      | 21 | 242 |
| 4923 | Phloem | Positive | ccaacctgctttgttctatc      | 21 | 242 |
| 4924 | Phloem | Positive | caacctgctttgttctatcgcg    | 24 | 243 |
| 4925 | Phloem | Positive | aacctgctttgttctatcgc      | 22 | 244 |
| 4926 | Phloem | Positive | aacctgctttgttctatcgc      | 22 | 244 |



|      |        |          |                              |    |     |
|------|--------|----------|------------------------------|----|-----|
| 5015 | Phloem | Positive | ctctcccgatcctctctga          | 23 | 268 |
| 5016 | Phloem | Positive | tctgcccggatcctctctg          | 21 | 269 |
| 5017 | Phloem | Positive | tctgcccggatcctctctga         | 22 | 269 |
| 5018 | Phloem | Positive | tctgcccggatcctctctga         | 22 | 269 |
| 5019 | Phloem | Positive | ctgcccggatcctctctg           | 20 | 270 |
| 5020 | Phloem | Positive | ctgcccggatcctctctga          | 21 | 270 |
| 5021 | Phloem | Positive | ctgcccggatcctctctga          | 21 | 270 |
| 5022 | Phloem | Positive | ccgcccggatcctctctgagc        | 20 | 273 |
| 5023 | Phloem | Positive | ccgcccggatcctctctgagc        | 20 | 273 |
| 5024 | Phloem | Positive | ccgcccggatcctctctgagcc       | 21 | 273 |
| 5025 | Phloem | Positive | ccgcccggatcctctctgagcc       | 21 | 273 |
| 5026 | Phloem | Positive | ccgcccggatcctctctgagcc       | 21 | 273 |
| 5027 | Phloem | Positive | ccgcccggatcctctctgagcc       | 21 | 273 |
| 5028 | Phloem | Positive | ccgcccggatcctctctgagcc       | 21 | 273 |
| 5029 | Phloem | Positive | ccgcccggatcctctctgagccc      | 22 | 273 |
| 5030 | Phloem | Positive | ccgcccggatcctctctgagccc      | 22 | 273 |
| 5031 | Phloem | Positive | cgcccggatcctctctgagcc        | 20 | 274 |
| 5032 | Phloem | Positive | cgcccggatcctctctgagcc        | 20 | 274 |
| 5033 | Phloem | Positive | cgcccggatcctctctgagccc       | 22 | 274 |
| 5034 | Phloem | Positive | gcccggatcctctctgagccc        | 21 | 275 |
| 5035 | Phloem | Positive | tctgggaaattctcgagtgc         | 21 | 296 |
| 5036 | Phloem | Negative | tgccgcaactcgagaattcccc       | 23 | 2   |
| 5037 | Phloem | Negative | gcccgaactcgagaattcccc        | 21 | 3   |
| 5038 | Phloem | Negative | ttgcccgaactcgagaattccc       | 22 | 4   |
| 5039 | Phloem | Negative | ttttgcccgaactcgagaattc       | 22 | 6   |
| 5040 | Phloem | Negative | ctttgcccgaactcgagaatt        | 22 | 7   |
| 5041 | Phloem | Negative | cctttgcccgaactcgagaa         | 21 | 9   |
| 5042 | Phloem | Negative | atgcttttgcggaactcgag         | 22 | 11  |
| 5043 | Phloem | Negative | gcatgcttttgcggaactcgag       | 24 | 11  |
| 5044 | Phloem | Negative | catgcttttgcggaactcga         | 22 | 12  |
| 5045 | Phloem | Negative | tctttgcatgcttttgcggc         | 21 | 19  |
| 5046 | Phloem | Negative | ttctttgcatgcttttgcgg         | 21 | 20  |
| 5047 | Phloem | Negative | ttctttgcatgcttttgcgg         | 22 | 20  |
| 5048 | Phloem | Negative | ttctttgcatgcttttgcgg         | 22 | 20  |
| 5049 | Phloem | Negative | ttttttgcatgcttttgcg          | 22 | 21  |
| 5050 | Phloem | Negative | ttttttgcatgcttttgc           | 21 | 22  |
| 5051 | Phloem | Negative | tttttttgcgcttttgc            | 22 | 22  |
| 5052 | Phloem | Negative | tttttttgcgcttttgc            | 22 | 22  |
| 5053 | Phloem | Negative | ttctttgcatgcttttgc           | 18 | 23  |
| 5054 | Phloem | Negative | tttttttgcgcttttgc            | 21 | 23  |
| 5055 | Phloem | Negative | tttttttgcgcttttgc            | 22 | 23  |
| 5056 | Phloem | Negative | gttttttgcgcttttgc            | 20 | 26  |
| 5057 | Phloem | Negative | gttttttgcgcttttgc            | 19 | 27  |
| 5058 | Phloem | Negative | gttttttgcgcttttgc            | 19 | 27  |
| 5059 | Phloem | Negative | cclagttttttgcgcttttgc        | 21 | 29  |
| 5060 | Phloem | Negative | aagcacctccctgctagttttt       | 24 | 39  |
| 5061 | Phloem | Negative | agcacctccctgctagtttt         | 21 | 41  |
| 5062 | Phloem | Negative | agcacctccctgctagtttt         | 21 | 41  |
| 5063 | Phloem | Negative | caggtaagcacctccctgctccta     | 22 | 46  |
| 5064 | Phloem | Negative | caggtaagcacctccctgctccta     | 22 | 46  |
| 5065 | Phloem | Negative | ctcaggttaagcacctccctgctccta  | 24 | 46  |
| 5066 | Phloem | Negative | tctcaggttaagcacctccctgctccta | 24 | 47  |
| 5067 | Phloem | Negative | ttctcaggttaagcacctccctg      | 22 | 50  |
| 5068 | Phloem | Negative | ctttctcaggttaagcacctccc      | 22 | 52  |
| 5069 | Phloem | Negative | ctttctcaggttaagcacctccc      | 22 | 52  |
| 5070 | Phloem | Negative | ctttctcaggttaagcacctcc       | 22 | 53  |
| 5071 | Phloem | Negative | ctttctcaggttaagcacctcc       | 21 | 54  |
| 5072 | Phloem | Negative | ctttctcaggttaagcacctcc       | 22 | 54  |
| 5073 | Phloem | Negative | ttctcaggttaagcacct           | 17 | 55  |
| 5074 | Phloem | Negative | ctctttctcaggttaagcacc        | 21 | 56  |
| 5075 | Phloem | Negative | ctctttctcaggttaagcacc        | 21 | 56  |
| 5076 | Phloem | Negative | cggggctcctttctcaggttaag      | 22 | 60  |
| 5077 | Phloem | Negative | cggggctcctttctcaggttaag      | 22 | 60  |
| 5078 | Phloem | Negative | cggggctcctttctcaggttaag      | 22 | 60  |
| 5079 | Phloem | Negative | ccggggctcctttctcaggtlaa      | 22 | 61  |
| 5080 | Phloem | Negative | ttgccccgggctcctttctca        | 22 | 66  |
| 5081 | Phloem | Negative | ttgccccgggctcctttctca        | 22 | 66  |
| 5082 | Phloem | Negative | ttgccccgggctcctttctca        | 22 | 66  |
| 5083 | Phloem | Negative | gagttgccccgggctcct           | 19 | 72  |
| 5084 | Phloem | Negative | gagttgccccgggctcct           | 19 | 72  |
| 5085 | Phloem | Negative | agagttgccccgggctcct          | 20 | 72  |
| 5086 | Phloem | Negative | agagttgccccgggctcct          | 20 | 72  |
| 5087 | Phloem | Negative | gagaagagttgccccgggctc        | 22 | 74  |
| 5088 | Phloem | Negative | tgagaagagttgccccgggctc       | 23 | 74  |
| 5089 | Phloem | Negative | gaagagttgccccgggct           | 19 | 75  |
| 5090 | Phloem | Negative | gagaagagttgccccgggct         | 20 | 76  |
| 5091 | Phloem | Negative | gagaagagttgccccgggct         | 20 | 76  |
| 5092 | Phloem | Negative | tgagaagagttgccccgggct        | 21 | 76  |
| 5093 | Phloem | Negative | ctgagaagagttgccccgggct       | 22 | 76  |
| 5094 | Phloem | Negative | ctgagaagagttgccccgggct       | 22 | 76  |
| 5095 | Phloem | Negative | ggattctgagaagagttgccccg      | 23 | 80  |
| 5096 | Phloem | Negative | tcgctggattctgagaagag         | 21 | 87  |
| 5097 | Phloem | Negative | tcgctggattctgagaagag         | 21 | 87  |
| 5098 | Phloem | Negative | tctcgtggattctgagaagag        | 23 | 87  |
| 5099 | Phloem | Negative | ctcgtggattctgagaagag         | 21 | 88  |
| 5100 | Phloem | Negative | ctcgtggattctgagaagag         | 21 | 88  |
| 5101 | Phloem | Negative | ctcgtggattctgagaagag         | 21 | 88  |
| 5102 | Phloem | Negative | tctcgtggattctgagaagag        | 22 | 88  |

|      |        |          |                           |    |     |
|------|--------|----------|---------------------------|----|-----|
| 5103 | Phloem | Negative | tctcgctggattctgagaagag    | 22 | 88  |
| 5104 | Phloem | Negative | tctcgctggattctgagaagag    | 22 | 88  |
| 5105 | Phloem | Negative | tctcgctggattctgagaagag    | 22 | 88  |
| 5106 | Phloem | Negative | tctcgctggattctgagaagag    | 22 | 88  |
| 5107 | Phloem | Negative | tctcgctggattctgagaaga     | 21 | 89  |
| 5108 | Phloem | Negative | ctctcgctggattctgagaaga    | 22 | 89  |
| 5109 | Phloem | Negative | ctctcgctggattctgagaaga    | 22 | 89  |
| 5110 | Phloem | Negative | ctctcgctggattctgagaaga    | 22 | 89  |
| 5111 | Phloem | Negative | ctctcgctggattctgagaaga    | 22 | 89  |
| 5112 | Phloem | Negative | ctctcgctggattctgagaaga    | 22 | 89  |
| 5113 | Phloem | Negative | ctctcgctggattctgagaag     | 21 | 90  |
| 5114 | Phloem | Negative | ctctcgctggattctgagaag     | 21 | 90  |
| 5115 | Phloem | Negative | ctctcgctggattctgagaag     | 21 | 90  |
| 5116 | Phloem | Negative | cctctcgctggattctgagaag    | 22 | 90  |
| 5117 | Phloem | Negative | cctctcgctggattctgagaag    | 22 | 90  |
| 5118 | Phloem | Negative | cctctcgctggattctgagaag    | 22 | 90  |
| 5119 | Phloem | Negative | cctctcgctggattctgagaag    | 22 | 90  |
| 5120 | Phloem | Negative | cctctcgctggattctgagaag    | 22 | 90  |
| 5121 | Phloem | Negative | cctctcgctggattctgagaa     | 21 | 91  |
| 5122 | Phloem | Negative | cctctcgctggattctgagaa     | 21 | 91  |
| 5123 | Phloem | Negative | cgccctctcgctggattctgaga   | 22 | 92  |
| 5124 | Phloem | Negative | cgccctctcgctggattctgaga   | 22 | 92  |
| 5125 | Phloem | Negative | cgccctctcgctggattctgaga   | 22 | 92  |
| 5126 | Phloem | Negative | cacgcctctcgctggattctgaga  | 24 | 92  |
| 5127 | Phloem | Negative | cctctcgctggattctgag       | 19 | 93  |
| 5128 | Phloem | Negative | cgccctctcgctggattctgag    | 21 | 93  |
| 5129 | Phloem | Negative | cgccctctcgctggattctgag    | 21 | 93  |
| 5130 | Phloem | Negative | cacgcctctcgctggattctgag   | 23 | 93  |
| 5131 | Phloem | Negative | gcctctcgctggattctga       | 19 | 94  |
| 5132 | Phloem | Negative | cacgcctctcgctggattctga    | 22 | 94  |
| 5133 | Phloem | Negative | cacgcctctcgctggattctga    | 22 | 94  |
| 5134 | Phloem | Negative | cacgcctctcgctggattctga    | 22 | 94  |
| 5135 | Phloem | Negative | cacgcctctcgctggattctga    | 22 | 94  |
| 5136 | Phloem | Negative | cacgcctctcgctggattctga    | 22 | 94  |
| 5137 | Phloem | Negative | cacgcctctcgctggattctga    | 22 | 94  |
| 5138 | Phloem | Negative | cacgcctctcgctggattctga    | 22 | 94  |
| 5139 | Phloem | Negative | cacgcctctcgctggattctga    | 22 | 94  |
| 5140 | Phloem | Negative | cacgcctctcgctggattctg     | 21 | 95  |
| 5141 | Phloem | Negative | cacgcctctcgctggattctg     | 21 | 95  |
| 5142 | Phloem | Negative | cacgcctctcgctggattctg     | 21 | 95  |
| 5143 | Phloem | Negative | cacgcctctcgctggattctg     | 21 | 95  |
| 5144 | Phloem | Negative | ccacgcctctcgctggattctg    | 22 | 95  |
| 5145 | Phloem | Negative | ccacgcctctcgctggattctg    | 22 | 95  |
| 5146 | Phloem | Negative | ccacgcctctcgctggattctg    | 22 | 95  |
| 5147 | Phloem | Negative | cgccctctcgctggattctg      | 18 | 96  |
| 5148 | Phloem | Negative | ccacgcctctcgctggattctg    | 19 | 98  |
| 5149 | Phloem | Negative | ctctccacgcctctcgctgat     | 22 | 99  |
| 5150 | Phloem | Negative | cctctctccacgcctctcgctg    | 22 | 102 |
| 5151 | Phloem | Negative | ctctccacgcctctcgct        | 18 | 103 |
| 5152 | Phloem | Negative | ctctccacgcctctcgct        | 20 | 103 |
| 5153 | Phloem | Negative | ctctccacgcctctcgct        | 20 | 103 |
| 5154 | Phloem | Negative | ccctctctccacgcctctcgct    | 22 | 103 |
| 5155 | Phloem | Negative | ccctctctccacgcctctcgct    | 22 | 103 |
| 5156 | Phloem | Negative | ccctctctccacgcctctcgct    | 22 | 103 |
| 5157 | Phloem | Negative | ggccctctctccacgcctctcgct  | 24 | 103 |
| 5158 | Phloem | Negative | cctctctccacgcctctcgc      | 20 | 104 |
| 5159 | Phloem | Negative | cctctctccacgcctctcgc      | 20 | 104 |
| 5160 | Phloem | Negative | ccctctctccacgcctctcgc     | 21 | 104 |
| 5161 | Phloem | Negative | ccctctctccacgcctctcgc     | 21 | 104 |
| 5162 | Phloem | Negative | ccctctctccacgcctctcgc     | 21 | 104 |
| 5163 | Phloem | Negative | gccctctctccacgcctctcgc    | 22 | 104 |
| 5164 | Phloem | Negative | gccctctctccacgcctctcgc    | 22 | 104 |
| 5165 | Phloem | Negative | gccctctctccacgcctctcgc    | 22 | 104 |
| 5166 | Phloem | Negative | gccctctctccacgcctctcgc    | 22 | 104 |
| 5167 | Phloem | Negative | gccctctctccacgcctctcgc    | 22 | 104 |
| 5168 | Phloem | Negative | gccctctctccacgcctctcgc    | 22 | 104 |
| 5169 | Phloem | Negative | gccctctctccacgcctctcgc    | 22 | 104 |
| 5170 | Phloem | Negative | gccctctctccacgcctctcgc    | 22 | 104 |
| 5171 | Phloem | Negative | cggccctctctccacgcctctcgc  | 24 | 104 |
| 5172 | Phloem | Negative | cctctctccacgcctctcgc      | 19 | 105 |
| 5173 | Phloem | Negative | cggccctctctccacgcctctcgc  | 23 | 105 |
| 5174 | Phloem | Negative | ctctctccacgcctctc         | 17 | 106 |
| 5175 | Phloem | Negative | cggccctctctccacgcctctc    | 24 | 106 |
| 5176 | Phloem | Negative | ggccctctctccacgcctctc     | 20 | 107 |
| 5177 | Phloem | Negative | cggccctctctccacgcctctc    | 21 | 107 |
| 5178 | Phloem | Negative | cggccctctctccacgcctctc    | 22 | 108 |
| 5179 | Phloem | Negative | cggccctctctccacgcctctc    | 22 | 108 |
| 5180 | Phloem | Negative | cggccctctctccacgcctctc    | 22 | 108 |
| 5181 | Phloem | Negative | cggccctctctccacgcctctc    | 22 | 108 |
| 5182 | Phloem | Negative | cggccctctctccacgcctctc    | 21 | 109 |
| 5183 | Phloem | Negative | cggccctctctccacgcctctc    | 21 | 109 |
| 5184 | Phloem | Negative | cggccctctctccacgcctctc    | 21 | 109 |
| 5185 | Phloem | Negative | cggccctctctccacgcctctc    | 22 | 109 |
| 5186 | Phloem | Negative | cggccctctctccacgcctctc    | 22 | 109 |
| 5187 | Phloem | Negative | cggccctctctccacgcctctc    | 22 | 109 |
| 5188 | Phloem | Negative | cggccctctctccacgcctctc    | 22 | 109 |
| 5189 | Phloem | Negative | caccggccctctctccacgcctctc | 24 | 109 |
| 5190 | Phloem | Negative | ggccctctctccacgcctctc     | 17 | 110 |

|      |        |          |                            |    |     |
|------|--------|----------|----------------------------|----|-----|
| 5191 | Phloem | Negative | caccgcgccctctctccacgc      | 22 | 111 |
| 5192 | Phloem | Negative | caccgcgccctctctccacgc      | 22 | 111 |
| 5193 | Phloem | Negative | gcaccgcgccctctctccacg      | 22 | 112 |
| 5194 | Phloem | Negative | caccgcgccctctctccac        | 20 | 113 |
| 5195 | Phloem | Negative | gcaccgcgccctctctccac       | 21 | 113 |
| 5196 | Phloem | Negative | agcaccgcgccctctctccac      | 22 | 113 |
| 5197 | Phloem | Negative | agagcaccgcgccctctctcc      | 22 | 115 |
| 5198 | Phloem | Negative | gagcaccgcgccctctctctc      | 20 | 116 |
| 5199 | Phloem | Negative | cagagcaccgcgccctctctc      | 22 | 116 |
| 5200 | Phloem | Negative | cagagcaccgcgccctctctc      | 22 | 116 |
| 5201 | Phloem | Negative | ccagagcaccgcgccctctct      | 22 | 117 |
| 5202 | Phloem | Negative | tcagagcaccgcgccctctc       | 22 | 118 |
| 5203 | Phloem | Negative | actccagagcaccgcgccctctc    | 24 | 118 |
| 5204 | Phloem | Negative | actccagagcaccgcgccctctc    | 24 | 118 |
| 5205 | Phloem | Negative | cagagcaccgcgccctc          | 18 | 120 |
| 5206 | Phloem | Negative | ctccagagcaccgcgccctc       | 21 | 120 |
| 5207 | Phloem | Negative | ctccagagcaccgcgccctc       | 21 | 120 |
| 5208 | Phloem | Negative | cagagcaccgcgccct           | 17 | 121 |
| 5209 | Phloem | Negative | actccagagcaccgcgccctc      | 20 | 122 |
| 5210 | Phloem | Negative | ctactccagagcaccgcgccctc    | 22 | 122 |
| 5211 | Phloem | Negative | tctactccagagcaccgcgccctc   | 23 | 122 |
| 5212 | Phloem | Negative | tctactccagagcaccgcgccctc   | 23 | 122 |
| 5213 | Phloem | Negative | tctactccagagcaccgcgccctc   | 23 | 122 |
| 5214 | Phloem | Negative | ctctactccagagcaccgcgccctc  | 24 | 122 |
| 5215 | Phloem | Negative | ctactccagagcaccgcgccctc    | 21 | 123 |
| 5216 | Phloem | Negative | ctactccagagcaccgcgccctc    | 21 | 123 |
| 5217 | Phloem | Negative | tctactccagagcaccgcgccctc   | 21 | 124 |
| 5218 | Phloem | Negative | tctactccagagcaccgcgccctc   | 21 | 124 |
| 5219 | Phloem | Negative | tctactccagagcaccgcgccctc   | 21 | 124 |
| 5220 | Phloem | Negative | tctactccagagcaccgcgccctc   | 21 | 124 |
| 5221 | Phloem | Negative | tctactccagagcaccgcgccctc   | 21 | 124 |
| 5222 | Phloem | Negative | ctctactccagagcaccgcgccctc  | 22 | 124 |
| 5223 | Phloem | Negative | ctctactccagagcaccgcgccctc  | 22 | 124 |
| 5224 | Phloem | Negative | cctctactccagagcaccgcgccctc | 22 | 125 |
| 5225 | Phloem | Negative | cctctactccagagcaccgcgccctc | 22 | 125 |
| 5226 | Phloem | Negative | cctctactccagagcaccgcgccctc | 22 | 125 |
| 5227 | Phloem | Negative | agcctctactccagagcaccg      | 22 | 127 |
| 5228 | Phloem | Negative | agagcctctactccagagcaccg    | 24 | 127 |
| 5229 | Phloem | Negative | agagcctctactccagagcaccg    | 24 | 127 |
| 5230 | Phloem | Negative | gagcctctactccagagcaccg     | 22 | 128 |
| 5231 | Phloem | Negative | gagcctctactccagagcaccg     | 22 | 128 |
| 5232 | Phloem | Negative | gagcctctactccagagcaccg     | 20 | 130 |
| 5233 | Phloem | Negative | cagagcctctactccagagcaccg   | 22 | 130 |
| 5234 | Phloem | Negative | cagagcctctactccagagcaccg   | 22 | 130 |
| 5235 | Phloem | Negative | cagagcctctactccagagcaccg   | 21 | 131 |
| 5236 | Phloem | Negative | cagagcctctactccagagcaccg   | 20 | 132 |
| 5237 | Phloem | Negative | cagagcctctactccagagcaccg   | 18 | 134 |
| 5238 | Phloem | Negative | cagagcctctactccagagcaccg   | 18 | 134 |
| 5239 | Phloem | Negative | aaggcagagcctctactccaga     | 22 | 134 |
| 5240 | Phloem | Negative | aaggcagagcctctactccaga     | 22 | 134 |
| 5241 | Phloem | Negative | aaggcagagcctctactccaga     | 22 | 134 |
| 5242 | Phloem | Negative | aaggcagagcctctactccaga     | 22 | 134 |
| 5243 | Phloem | Negative | aaggcagagcctctactccaga     | 22 | 134 |
| 5244 | Phloem | Negative | aaggcagagcctctactccaga     | 22 | 134 |
| 5245 | Phloem | Negative | aaggcagagcctctactccaga     | 22 | 134 |
| 5246 | Phloem | Negative | aaggcagagcctctactccaga     | 22 | 134 |
| 5247 | Phloem | Negative | gaaggcagagcctctactccaga    | 23 | 134 |
| 5248 | Phloem | Negative | gaaggcagagcctctactccaga    | 23 | 134 |
| 5249 | Phloem | Negative | gaaggcagagcctctactccaga    | 23 | 134 |
| 5250 | Phloem | Negative | cgaaggcagagcctctactccaga   | 24 | 134 |
| 5251 | Phloem | Negative | cgaaggcagagcctctactccaga   | 24 | 134 |
| 5252 | Phloem | Negative | cgaaggcagagcctctactccaga   | 24 | 134 |
| 5253 | Phloem | Negative | gaaggcagagcctctactccag     | 22 | 135 |
| 5254 | Phloem | Negative | gaaggcagagcctctactccag     | 22 | 135 |
| 5255 | Phloem | Negative | gaaggcagagcctctactcca      | 21 | 136 |
| 5256 | Phloem | Negative | gaaggcagagcctctactcca      | 21 | 136 |
| 5257 | Phloem | Negative | gaaggcagagcctctactcca      | 21 | 136 |
| 5258 | Phloem | Negative | cgaaggcagagcctctactcca     | 22 | 136 |
| 5259 | Phloem | Negative | tcgaaggcagagcctctactcca    | 23 | 136 |
| 5260 | Phloem | Negative | tcgaaggcagagcctctactcca    | 23 | 136 |
| 5261 | Phloem | Negative | cgaaggcagagcctctactcc      | 21 | 137 |
| 5262 | Phloem | Negative | cgaaggcagagcctctactcc      | 21 | 137 |
| 5263 | Phloem | Negative | tcgaaggcagagcctctactcc     | 22 | 137 |
| 5264 | Phloem | Negative | tcgaaggcagagcctctactcc     | 22 | 137 |
| 5265 | Phloem | Negative | tcgaaggcagagcctctactcc     | 22 | 137 |
| 5266 | Phloem | Negative | tcgaaggcagagcctctactcc     | 22 | 137 |
| 5267 | Phloem | Negative | tcgaaggcagagcctctactcc     | 21 | 138 |
| 5268 | Phloem | Negative | tcgaaggcagagcctctactcc     | 21 | 138 |
| 5269 | Phloem | Negative | ttcgaaggcagagcctctactcc    | 22 | 138 |
| 5270 | Phloem | Negative | ttcgaaggcagagcctctactcc    | 22 | 138 |
| 5271 | Phloem | Negative | ttcgaaggcagagcctctactcc    | 22 | 139 |
| 5272 | Phloem | Negative | ttcgaaggcagagcctctactcc    | 22 | 139 |
| 5273 | Phloem | Negative | ttcgaaggcagagcctctactcc    | 22 | 139 |
| 5274 | Phloem | Negative | ttcgaaggcagagcctctactcc    | 22 | 139 |
| 5275 | Phloem | Negative | ttcgaaggcagagcctctactcc    | 22 | 139 |
| 5276 | Phloem | Negative | gttcgaaggcagagcctctactcc   | 23 | 139 |
| 5277 | Phloem | Negative | ttcgaaggcagagcctctactcc    | 21 | 140 |
| 5278 | Phloem | Negative | gttcgaaggcagagcctctactcc   | 22 | 140 |

|      |        |          |                          |    |     |
|------|--------|----------|--------------------------|----|-----|
| 5279 | Phloem | Negative | gtttcgaaggcagagcctctac   | 22 | 140 |
| 5280 | Phloem | Negative | gtttcgaaggcagagcctctac   | 22 | 140 |
| 5281 | Phloem | Negative | gtttcgaaggcagagcctctac   | 22 | 140 |
| 5282 | Phloem | Negative | gtttcgaaggcagagcctctac   | 23 | 140 |
| 5283 | Phloem | Negative | gtttcgaaggcagagcctctac   | 24 | 140 |
| 5284 | Phloem | Negative | gtttcgaaggcagagcctctac   | 24 | 140 |
| 5285 | Phloem | Negative | gtttcgaaggcagagcctctac   | 24 | 140 |
| 5286 | Phloem | Negative | ttcgaaggcagagcctcta      | 19 | 141 |
| 5287 | Phloem | Negative | gtttcgaaggcagagcctcta    | 21 | 141 |
| 5288 | Phloem | Negative | gtttcgaaggcagagcctcta    | 21 | 141 |
| 5289 | Phloem | Negative | gtttcgaaggcagagcctcta    | 21 | 141 |
| 5290 | Phloem | Negative | gtttcgaaggcagagcctcta    | 21 | 141 |
| 5291 | Phloem | Negative | gtttcgaaggcagagcctcta    | 21 | 141 |
| 5292 | Phloem | Negative | gtttcgaaggcagagcctcta    | 22 | 141 |
| 5293 | Phloem | Negative | gtttcgaaggcagagcctcta    | 22 | 141 |
| 5294 | Phloem | Negative | gtttcgaaggcagagcctcta    | 22 | 141 |
| 5295 | Phloem | Negative | gtttcgaaggcagagcctc      | 19 | 143 |
| 5296 | Phloem | Negative | gtttcgaaggcagagcctc      | 20 | 143 |
| 5297 | Phloem | Negative | gtttcgaaggcagagcctc      | 21 | 143 |
| 5298 | Phloem | Negative | gtttcgaaggcagagcctc      | 21 | 143 |
| 5299 | Phloem | Negative | cgaaggcagagcct           | 14 | 144 |
| 5300 | Phloem | Negative | gtttcgaaggcagagcct       | 19 | 144 |
| 5301 | Phloem | Negative | gtttcgaaggcagagcct       | 20 | 144 |
| 5302 | Phloem | Negative | ggtttcgaaggcagagcct      | 21 | 144 |
| 5303 | Phloem | Negative | gtttcgaaggcaga           | 15 | 148 |
| 5304 | Phloem | Negative | gtttcgaaggcaga           | 15 | 148 |
| 5305 | Phloem | Negative | tcgatggtttcgaaggcaga     | 22 | 148 |
| 5306 | Phloem | Negative | atcgatggtttcgaaggcaga    | 23 | 148 |
| 5307 | Phloem | Negative | cgatggtttcgaaggcag       | 20 | 149 |
| 5308 | Phloem | Negative | atcgatggtttcgaaggca      | 21 | 150 |
| 5309 | Phloem | Negative | atcgatggtttcgaaggca      | 21 | 150 |
| 5310 | Phloem | Negative | cgatcgatggtttcgaaggc     | 22 | 151 |
| 5311 | Phloem | Negative | cgatcgatggtttcgaaggc     | 22 | 151 |
| 5312 | Phloem | Negative | cgatcgatggtttcgaaggc     | 22 | 151 |
| 5313 | Phloem | Negative | cgatcgatggtttcgaagg      | 21 | 152 |
| 5314 | Phloem | Negative | cgatcgatggtttcgaagg      | 21 | 152 |
| 5315 | Phloem | Negative | acgatcgatggtttcgaag      | 21 | 153 |
| 5316 | Phloem | Negative | gacgatcgatggtttcgaag     | 21 | 154 |
| 5317 | Phloem | Negative | gacgatcgatggtttcgaag     | 21 | 154 |
| 5318 | Phloem | Negative | gacgatcgatggtttcgaag     | 21 | 154 |
| 5319 | Phloem | Negative | ggacgatcgatggtttcgaag    | 22 | 154 |
| 5320 | Phloem | Negative | aagggacgatcgatggtttcga   | 24 | 155 |
| 5321 | Phloem | Negative | aagggacgatcgatggtttcga   | 24 | 155 |
| 5322 | Phloem | Negative | gaagggacgatcgatggtttcga  | 24 | 156 |
| 5323 | Phloem | Negative | aagggacgatcgatggtttc     | 22 | 157 |
| 5324 | Phloem | Negative | aagggacgatcgatggtttc     | 22 | 157 |
| 5325 | Phloem | Negative | aagggacgatcgatggtttc     | 22 | 157 |
| 5326 | Phloem | Negative | aagggacgatcgatggtttc     | 22 | 157 |
| 5327 | Phloem | Negative | aagggacgatcgatggtttc     | 22 | 157 |
| 5328 | Phloem | Negative | aagggacgatcgatggtttc     | 22 | 157 |
| 5329 | Phloem | Negative | gaagggacgatcgatggtttc    | 23 | 157 |
| 5330 | Phloem | Negative | agaagggacgatcgatggtttc   | 24 | 157 |
| 5331 | Phloem | Negative | aagggacgatcgatggttt      | 21 | 158 |
| 5332 | Phloem | Negative | aagggacgatcgatggttt      | 21 | 158 |
| 5333 | Phloem | Negative | gaagggacgatcgatggttt     | 22 | 158 |
| 5334 | Phloem | Negative | gaagggacgatcgatggttt     | 22 | 158 |
| 5335 | Phloem | Negative | gaagggacgatcgatggttt     | 22 | 158 |
| 5336 | Phloem | Negative | gaagggacgatcgatggttt     | 22 | 158 |
| 5337 | Phloem | Negative | aagggacgatcgatggtgt      | 19 | 160 |
| 5338 | Phloem | Negative | agaagggacgatcgatggtgt    | 21 | 160 |
| 5339 | Phloem | Negative | agaagggacgatcgatggtgt    | 21 | 160 |
| 5340 | Phloem | Negative | agaagggacgatcgatggtgt    | 21 | 160 |
| 5341 | Phloem | Negative | agaagggacgatcgatggtgt    | 21 | 160 |
| 5342 | Phloem | Negative | agaagggacgatcgatggtgt    | 21 | 160 |
| 5343 | Phloem | Negative | agaagggacgatcgatggtgt    | 21 | 160 |
| 5344 | Phloem | Negative | agaagggacgatcgatggtgt    | 21 | 160 |
| 5345 | Phloem | Negative | aagaagggacgatcgatggtgt   | 22 | 160 |
| 5346 | Phloem | Negative | aagaagggacgatcgatggtgt   | 22 | 160 |
| 5347 | Phloem | Negative | aagaagggacgatcgatggtgt   | 22 | 160 |
| 5348 | Phloem | Negative | aagaagggacgatcgatggtgt   | 22 | 160 |
| 5349 | Phloem | Negative | agaagggacgatcgatggt      | 19 | 162 |
| 5350 | Phloem | Negative | agaagaagggacgatcgatgg    | 21 | 163 |
| 5351 | Phloem | Negative | aagaagaagggacgatcgatgg   | 22 | 163 |
| 5352 | Phloem | Negative | aagaagaagggacgatcgatgg   | 22 | 163 |
| 5353 | Phloem | Negative | taagaagaagggacgatcgat    | 22 | 165 |
| 5354 | Phloem | Negative | taagaagaagggacgatcgat    | 22 | 165 |
| 5355 | Phloem | Negative | taagaagaagggacgatcgat    | 21 | 166 |
| 5356 | Phloem | Negative | taagaagaagggacgatcgat    | 21 | 166 |
| 5357 | Phloem | Negative | taagaagaagggacgatcgat    | 21 | 166 |
| 5358 | Phloem | Negative | gtaagaagaagggacgatcgat   | 22 | 166 |
| 5359 | Phloem | Negative | aggtaagaagaagggacgatc    | 22 | 168 |
| 5360 | Phloem | Negative | aggtaagaagaagggacgatc    | 22 | 168 |
| 5361 | Phloem | Negative | aggtaagaagaagggacgatc    | 22 | 168 |
| 5362 | Phloem | Negative | agaaggttaagaagaagggac    | 21 | 172 |
| 5363 | Phloem | Negative | cagaagaaggttaagaagaag    | 21 | 176 |
| 5364 | Phloem | Negative | ccagaagaaggttaagaagaag   | 22 | 176 |
| 5365 | Phloem | Negative | ccagaagaaggttaagaagaag   | 21 | 177 |
| 5366 | Phloem | Negative | agccagaagaaggttaagaagaag | 23 | 177 |



|      |        |          |                           |    |     |
|------|--------|----------|---------------------------|----|-----|
| 5455 | Phloem | Negative | caccggtcgcgtccaagaaga     | 23 | 199 |
| 5456 | Phloem | Negative | ccggtcgcgtccaagaag        | 20 | 200 |
| 5457 | Phloem | Negative | caccggtcgcgtccaagaag      | 22 | 200 |
| 5458 | Phloem | Negative | caccggtcgcgtccaagaag      | 22 | 200 |
| 5459 | Phloem | Negative | caccggtcgcgtccaagaag      | 22 | 200 |
| 5460 | Phloem | Negative | caccggtcgcgtccaagaag      | 22 | 200 |
| 5461 | Phloem | Negative | caccggtcgcgtccaagaag      | 22 | 200 |
| 5462 | Phloem | Negative | caccggtcgcgtccaagaag      | 22 | 200 |
| 5463 | Phloem | Negative | ccaccggtcgcgtccaagaag     | 23 | 200 |
| 5464 | Phloem | Negative | caccggtcgcgtccaagaa       | 21 | 201 |
| 5465 | Phloem | Negative | caccggtcgcgtccaagaa       | 21 | 201 |
| 5466 | Phloem | Negative | caccggtcgcgtccaagaa       | 21 | 201 |
| 5467 | Phloem | Negative | caccggtcgcgtccaagaa       | 21 | 201 |
| 5468 | Phloem | Negative | caccggtcgcgtccaagaa       | 21 | 201 |
| 5469 | Phloem | Negative | ccaccggtcgcgtccaagaa      | 21 | 201 |
| 5470 | Phloem | Negative | caccggtcgcgtccaagaa       | 21 | 201 |
| 5471 | Phloem | Negative | caccggtcgcgtccaagaa       | 21 | 201 |
| 5472 | Phloem | Negative | ccaccggtcgcgtccaagaa      | 22 | 201 |
| 5473 | Phloem | Negative | ccaccggtcgcgtccaagaa      | 22 | 201 |
| 5474 | Phloem | Negative | ccaccggtcgcgtccaagaa      | 22 | 201 |
| 5475 | Phloem | Negative | ccaccggtcgcgtccaagaa      | 22 | 201 |
| 5476 | Phloem | Negative | ccaccggtcgcgtccaagaa      | 22 | 201 |
| 5477 | Phloem | Negative | ccaccggtcgcgtccaagaa      | 22 | 201 |
| 5478 | Phloem | Negative | ccaccggtcgcgtccaagaa      | 22 | 201 |
| 5479 | Phloem | Negative | ccaccggtcgcgtccaagaa      | 22 | 201 |
| 5480 | Phloem | Negative | ccaccggtcgcgtccaagaa      | 22 | 201 |
| 5481 | Phloem | Negative | ccaccggtcgcgtccaagaa      | 22 | 201 |
| 5482 | Phloem | Negative | caccggtcgcgtccaaga        | 20 | 202 |
| 5483 | Phloem | Negative | ccaccggtcgcgtccaaga       | 21 | 202 |
| 5484 | Phloem | Negative | accggtcgcgtcca            | 17 | 204 |
| 5485 | Phloem | Negative | tgccaccggtcgcgtcca        | 21 | 204 |
| 5486 | Phloem | Negative | tgccaccggtcgcgtcca        | 21 | 204 |
| 5487 | Phloem | Negative | tgccaccggtcgcgtcca        | 21 | 204 |
| 5488 | Phloem | Negative | gtgccaccggtcgcgtcca       | 22 | 204 |
| 5489 | Phloem | Negative | gtgccaccggtcgcgtcca       | 21 | 205 |
| 5490 | Phloem | Negative | ccaccggtcgcgtcca          | 17 | 206 |
| 5491 | Phloem | Negative | caggggtgccaccggtcgcgtc    | 22 | 209 |
| 5492 | Phloem | Negative | gcaggggtgccaccggtcgcg     | 21 | 211 |
| 5493 | Phloem | Negative | gagcaggggtgccaccggtcgcg   | 22 | 212 |
| 5494 | Phloem | Negative | cgagcaggggtgccaccggtcgcg  | 23 | 212 |
| 5495 | Phloem | Negative | cgagcaggggtgccaccggtc     | 21 | 214 |
| 5496 | Phloem | Negative | agcaggggtgccaccggtc       | 17 | 216 |
| 5497 | Phloem | Negative | cgaaccgagcaggggtgccacc    | 22 | 218 |
| 5498 | Phloem | Negative | cgaaccgagcaggggtgccacc    | 22 | 218 |
| 5499 | Phloem | Negative | gaaccgagcaggggtgccacc     | 20 | 219 |
| 5500 | Phloem | Negative | cgaaccgagcaggggtgccacc    | 21 | 219 |
| 5501 | Phloem | Negative | gcgaaccgagcaggggtgccacc   | 22 | 219 |
| 5502 | Phloem | Negative | gcgaaccgagcaggggtgccacc   | 22 | 219 |
| 5503 | Phloem | Negative | gcgaaccgagcaggggtgccacc   | 22 | 219 |
| 5504 | Phloem | Negative | gcgaaccgagcaggggtgccacc   | 22 | 219 |
| 5505 | Phloem | Negative | gcgaaccgagcaggggtgccacc   | 21 | 220 |
| 5506 | Phloem | Negative | agcgaaccgagcaggggtgccacc  | 22 | 220 |
| 5507 | Phloem | Negative | agcgaaccgagcaggggtgccacc  | 22 | 220 |
| 5508 | Phloem | Negative | agcgaaccgagcaggggtgccacc  | 22 | 220 |
| 5509 | Phloem | Negative | agcgaaccgagcaggggtgccacc  | 22 | 220 |
| 5510 | Phloem | Negative | gagcgaaccgagcaggggtgccacc | 23 | 220 |
| 5511 | Phloem | Negative | tgagcgaaccgagcaggggt      | 21 | 224 |
| 5512 | Phloem | Negative | caggttgagcgaaccgagcag     | 22 | 228 |
| 5513 | Phloem | Negative | caggttgagcgaaccgagcag     | 22 | 228 |
| 5514 | Phloem | Negative | aggttgagcgaaccgagcag      | 20 | 229 |
| 5515 | Phloem | Negative | caggttgagcgaaccgag        | 18 | 232 |
| 5516 | Phloem | Negative | caggttgagcgaaccgag        | 17 | 233 |
| 5517 | Phloem | Negative | aaaagcaggttgagcgaaccg     | 22 | 233 |
| 5518 | Phloem | Negative | aaaagcaggttgagcgaaccg     | 20 | 235 |
| 5519 | Phloem | Negative | agaacaaaagcaggttgagc      | 22 | 238 |
| 5520 | Phloem | Negative | agaacaaaagcaggttgagc      | 22 | 238 |
| 5521 | Phloem | Negative | tagaacaaaagcaggttgagc     | 22 | 239 |
| 5522 | Phloem | Negative | tagaacaaaagcaggttgagc     | 21 | 240 |
| 5523 | Phloem | Negative | cagatagaacaaaagcaggttg    | 22 | 243 |
| 5524 | Phloem | Negative | cgagatagaacaaaagcaggttg   | 24 | 243 |
| 5525 | Phloem | Negative | ggcgcagatagaacaaaagcaggt  | 24 | 245 |
| 5526 | Phloem | Negative | ggcgcagatagaacaaaagcaggt  | 24 | 245 |
| 5527 | Phloem | Negative | ggcgcagatagaacaaaagcaggt  | 24 | 245 |
| 5528 | Phloem | Negative | gagggcgcagatagaacaaaagc   | 22 | 249 |
| 5529 | Phloem | Negative | cagaggcgcagatagaacaaaagc  | 24 | 249 |
| 5530 | Phloem | Negative | cagaggcgcagatagaacaaaagc  | 24 | 249 |
| 5531 | Phloem | Negative | cagaggcgcagatagaacaaaagc  | 24 | 249 |
| 5532 | Phloem | Negative | cagaggcgcagatagaacaaaagc  | 24 | 249 |
| 5533 | Phloem | Negative | cagaggcgcagatagaacaaaagc  | 24 | 249 |
| 5534 | Phloem | Negative | cagaggcgcagatagaacaaaagc  | 24 | 249 |
| 5535 | Phloem | Negative | agaggcgcagatagaacaaaag    | 22 | 250 |
| 5536 | Phloem | Negative | agaggcgcagatagaacaaaag    | 22 | 250 |
| 5537 | Phloem | Negative | agaggcgcagatagaacaaaag    | 22 | 250 |
| 5538 | Phloem | Negative | agaggcgcagatagaacaaaag    | 22 | 250 |
| 5539 | Phloem | Negative | cagaggcgcagatagaacaaaag   | 23 | 250 |
| 5540 | Phloem | Negative | cagaggcgcagatagaacaaaag   | 23 | 250 |
| 5541 | Phloem | Negative | agaggcgcagatagaacaaaa     | 21 | 251 |
| 5542 | Phloem | Negative | agaggcgcagatagaacaaaa     | 21 | 251 |
